# Supplementary material for: Cellulose Functionalization Using N-Heterocyclic-Based Leaving Group Chemistry
Source: MDPI journal article supplement (doi:10.3390/polym16010149), 2024-01-03

*Supporting Information for*

**Cellulose Functionalization Based on *N*-Heterocyclic  
based Leaving Group Chemistry**

Arvind Negi, Ali R. Tehrani-Bagha \*

*Department of Bioproducts and Biosystems, School of Chemical Engineering, Aalto  
University, 02150 Espoo, Finland*

*\*Corresponding author: [ali.tehrani@aalto.fi](mailto:ali.tehrani@aalto.fi)*

## Contents

| <i>Figures</i> | <i>NMR assignments of representative compounds</i>                                                            |
|----------------|---------------------------------------------------------------------------------------------------------------|
| <i>S1</i>      | <sup>1</sup> H-NMR of <i>1,1',1''-(1,3,5-triazine-2,4,6-triyl)tris(pyridin-1-ium)</i> (PrAct-1)               |
| <i>S2</i>      | <sup>13</sup> C- NMR of <i>1,1',1''-(1,3,5-triazine-2,4,6-triyl)tris(pyridin-1-ium)</i> (PrAct-1)             |
| <i>S3</i>      | <sup>1</sup> H-NMR of <i>3,3',3''-(1,3,5-triazine-2,4,6-triyl)tris(1-methyl-1H-imidazol-3-ium)</i> (PrAct-2)  |
| <i>S4</i>      | <sup>13</sup> C-NMR of <i>3,3',3''-(1,3,5-triazine-2,4,6-triyl)tris(1-methyl-1H-imidazol-3-ium)</i> (PrAct-2) |
| <i>S5</i>      | <sup>1</sup> H-NMR of <i>1,1',1''-(1,3,5-triazine-2,4,6-triyl)tris(3-carboxypyridin-1-ium)</i> (PrAct-3)      |
| <i>S6</i>      | <sup>13</sup> C-NMR of <i>1,1',1''-(1,3,5-triazine-2,4,6-triyl)tris(3-carboxypyridin-1-ium)</i> (PrAct-3)     |
| <i>S7</i>      | <sup>1</sup> H-NMR of <i>2-pyridinium methyl phenyl ketone</i> (Act-1)                                        |
| <i>S8</i>      | <sup>1</sup> H-NMR of <i>2-pyridinium methyl decanyl ketone</i> (Act-2)                                       |
| <i>S9</i>      | <sup>1</sup> H-NMR of <i>3-carboxy-1-dodecylpyridin-1-ium</i> (Act-3)                                         |
| <i>S10</i>     | <sup>1</sup> H-NMR of <i>2-nicotinyl methyl phenyl ketone</i> (Act-4)                                         |
|                | <b><i>Reflectance Spectroscopy: Results for anthraquinone based colorants</i></b>                             |
| <i>S11</i>     | Reflectance spectroscopical data for colorant-1                                                               |
| <i>S12</i>     | Reflectance spectroscopical data for colorant-2                                                               |
|                | <b><i>FTIR Spectroscopy: Chemical characterization of cellulose functionalisation</i></b>                     |
| <i>S13</i>     | Cysteine-treated preactivated cotton fabrics                                                                  |
| <i>S14</i>     | Zein-treated preactivated cotton fabrics                                                                      |
|                | <b><i>Time-Gated Raman spectroscopy: Chemical characterization of cellulose functionalisation</i></b>         |
| <i>S15</i>     | 1-Nonanol-treated preactivated cotton fabrics                                                                 |
| <i>S16</i>     | 1,8-Octadiol-treated preactivated cotton fabrics                                                              |
| <i>S17</i>     | Cysteine-treated preactivated cotton fabrics                                                                  |
| <i>S18</i>     | Benzylamine-treated preactivated cotton fabrics                                                               |
| <i>S19</i>     | Phenol-treated preactivated cotton fabrics                                                                    |
| <i>S20</i>     | Act-1-treated cotton fabrics                                                                                  |
| <i>S21</i>     | Act-2-treated cotton fabrics                                                                                  |

**S1.**  $^1\text{H}$ -NMR of *1,1',1''*-(1,3,5-triazine-2,4,6-triyl)tris(pyridin-1-ium) (PrAct-1)

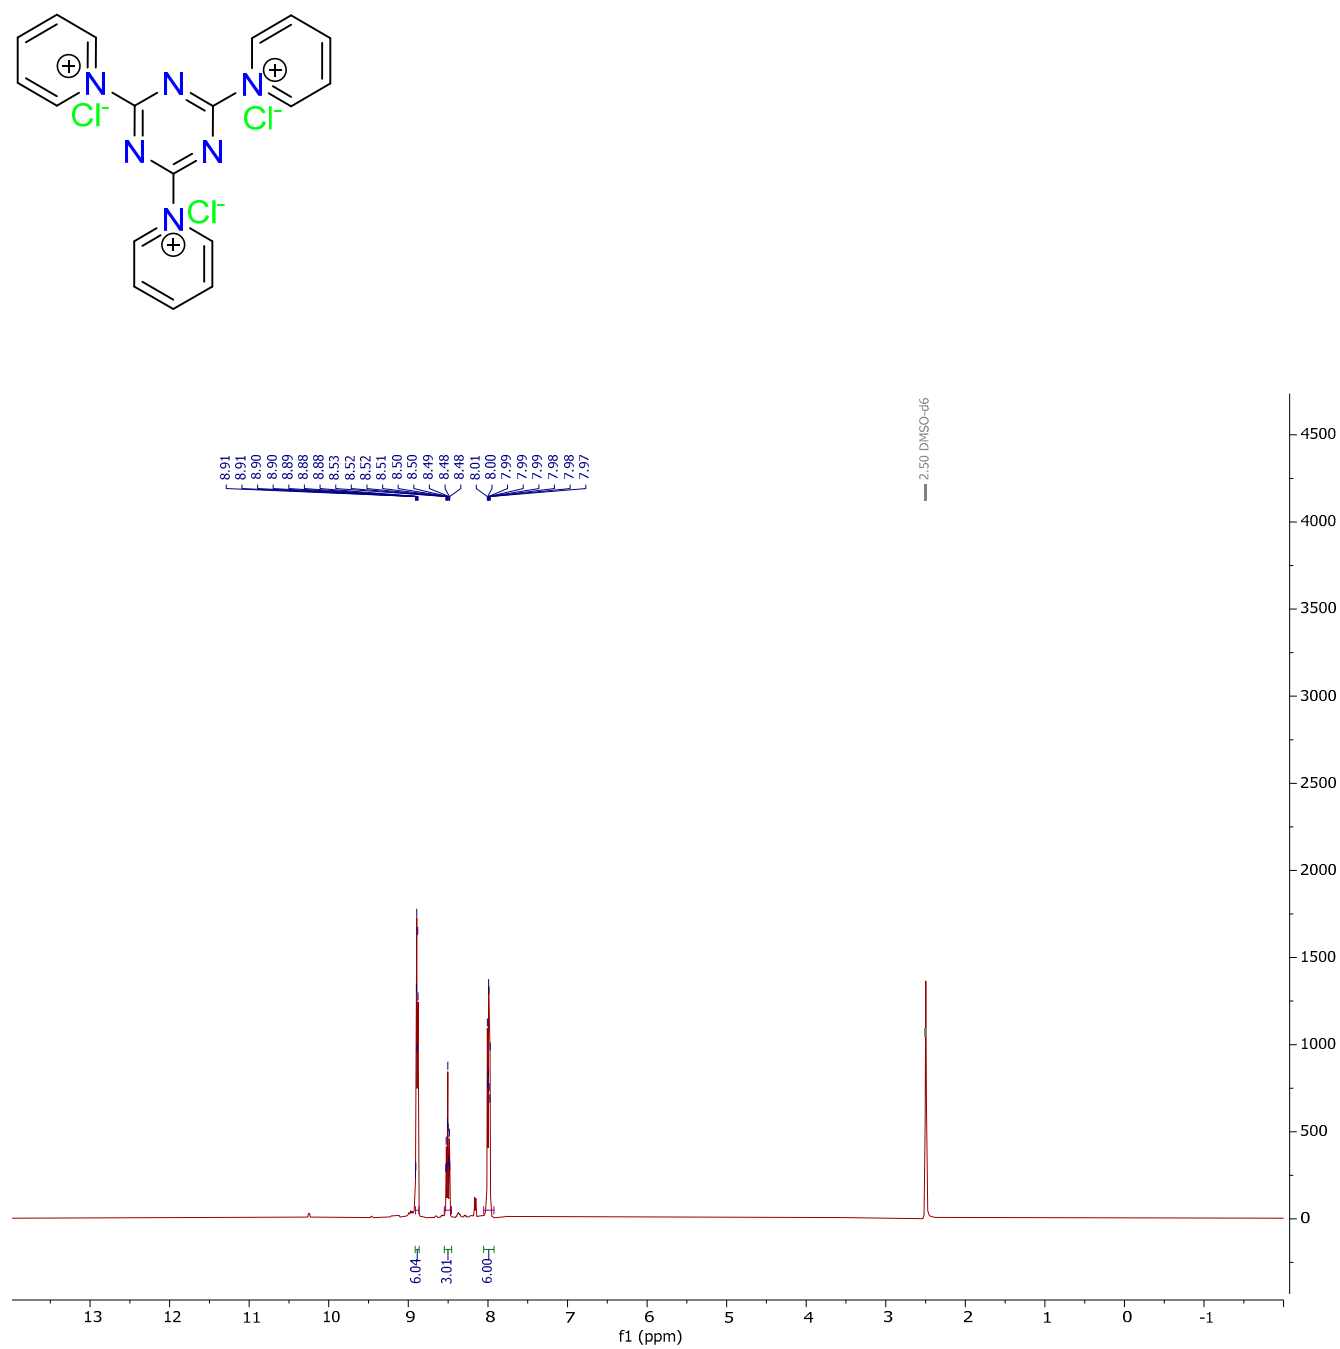

**S2** ·  $^{13}\text{C}$ -NMR of *1,1',1''*-(1,3,5-triazine-2,4,6-triyl)tris(pyridin-1-ium) (PrAct-1)

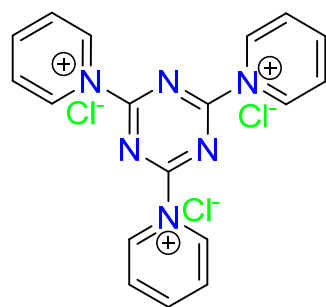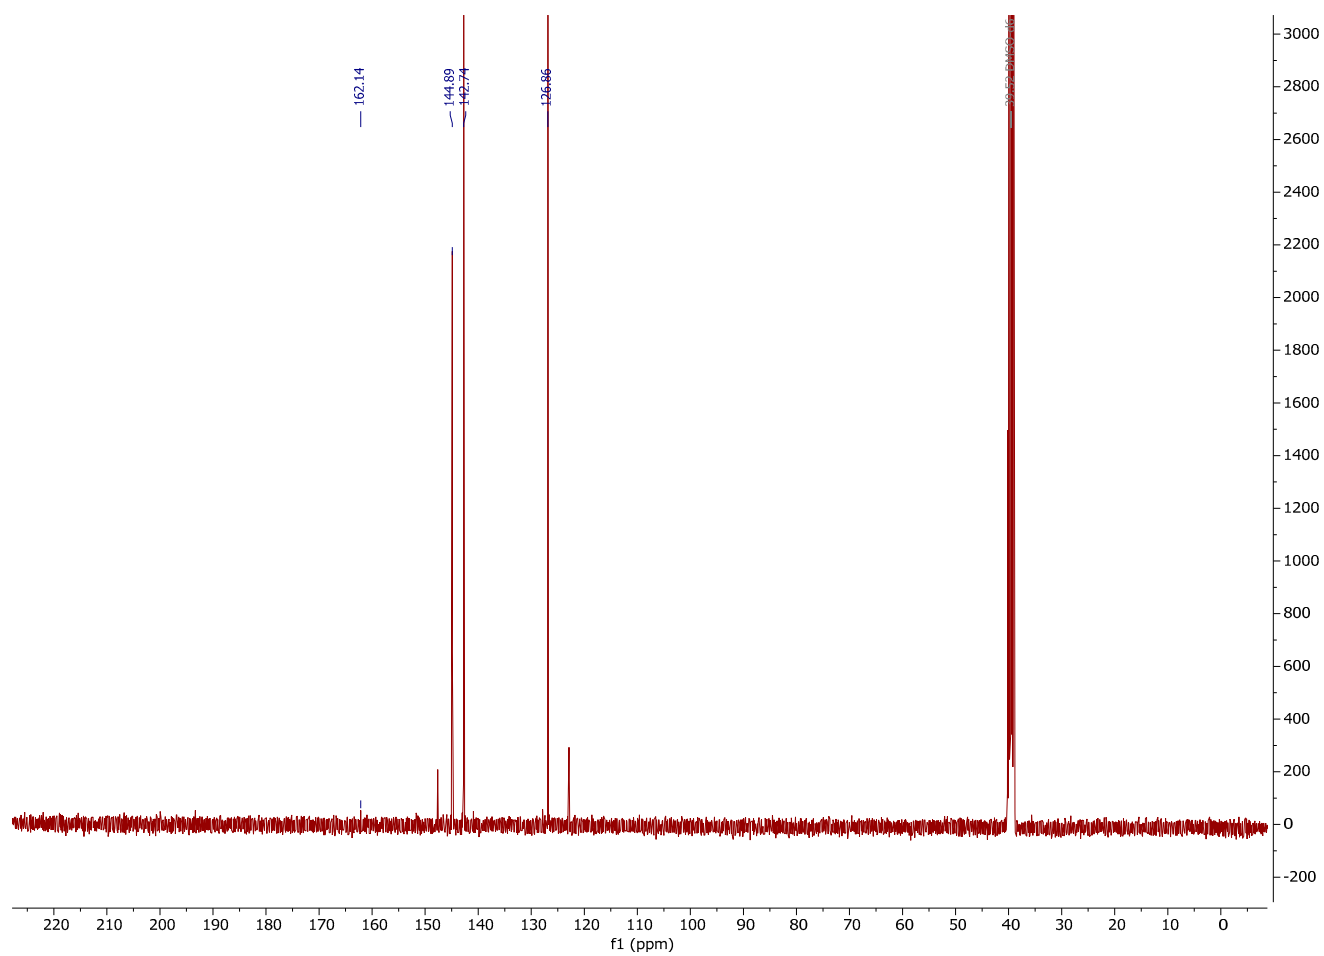

**S3.**  $^1\text{H}$ -NMR of 3,3',3''-(1,3,5-triazine-2,4,6-triyl)tris(1-methyl-1H-imidazol-3-ium) (PrAct-2)

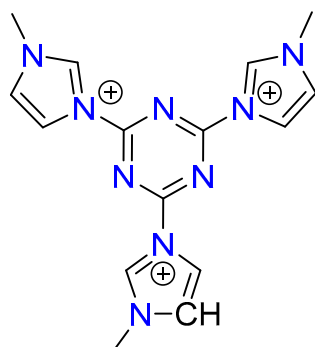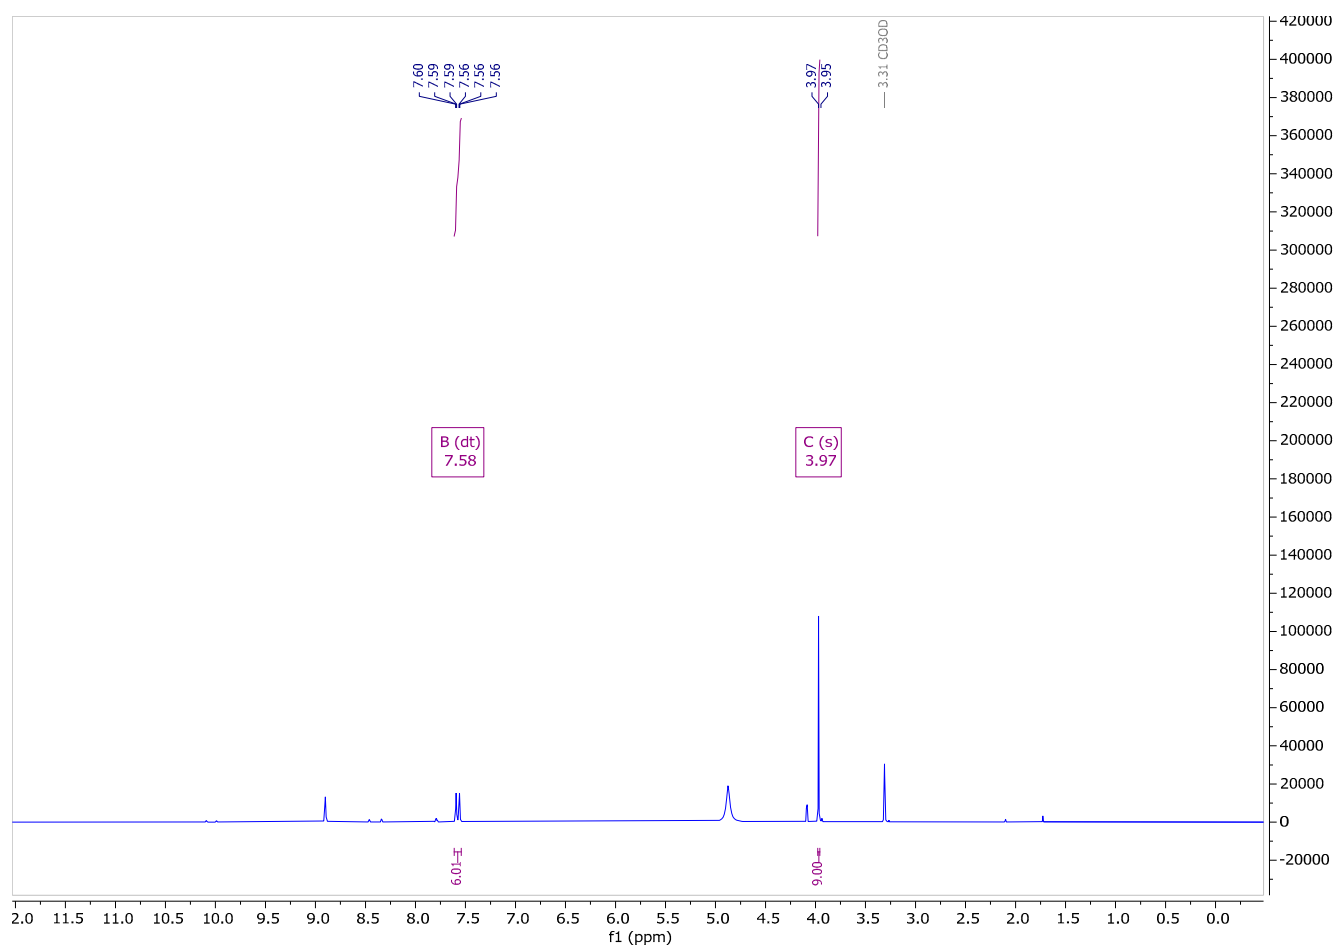

**S4.**  $^1\text{H}$ -NMR of 3,3',3''-(1,3,5-triazine-2,4,6-triyl)tris(1-methyl-1H-imidazol-3-ium) (PrAct-2)

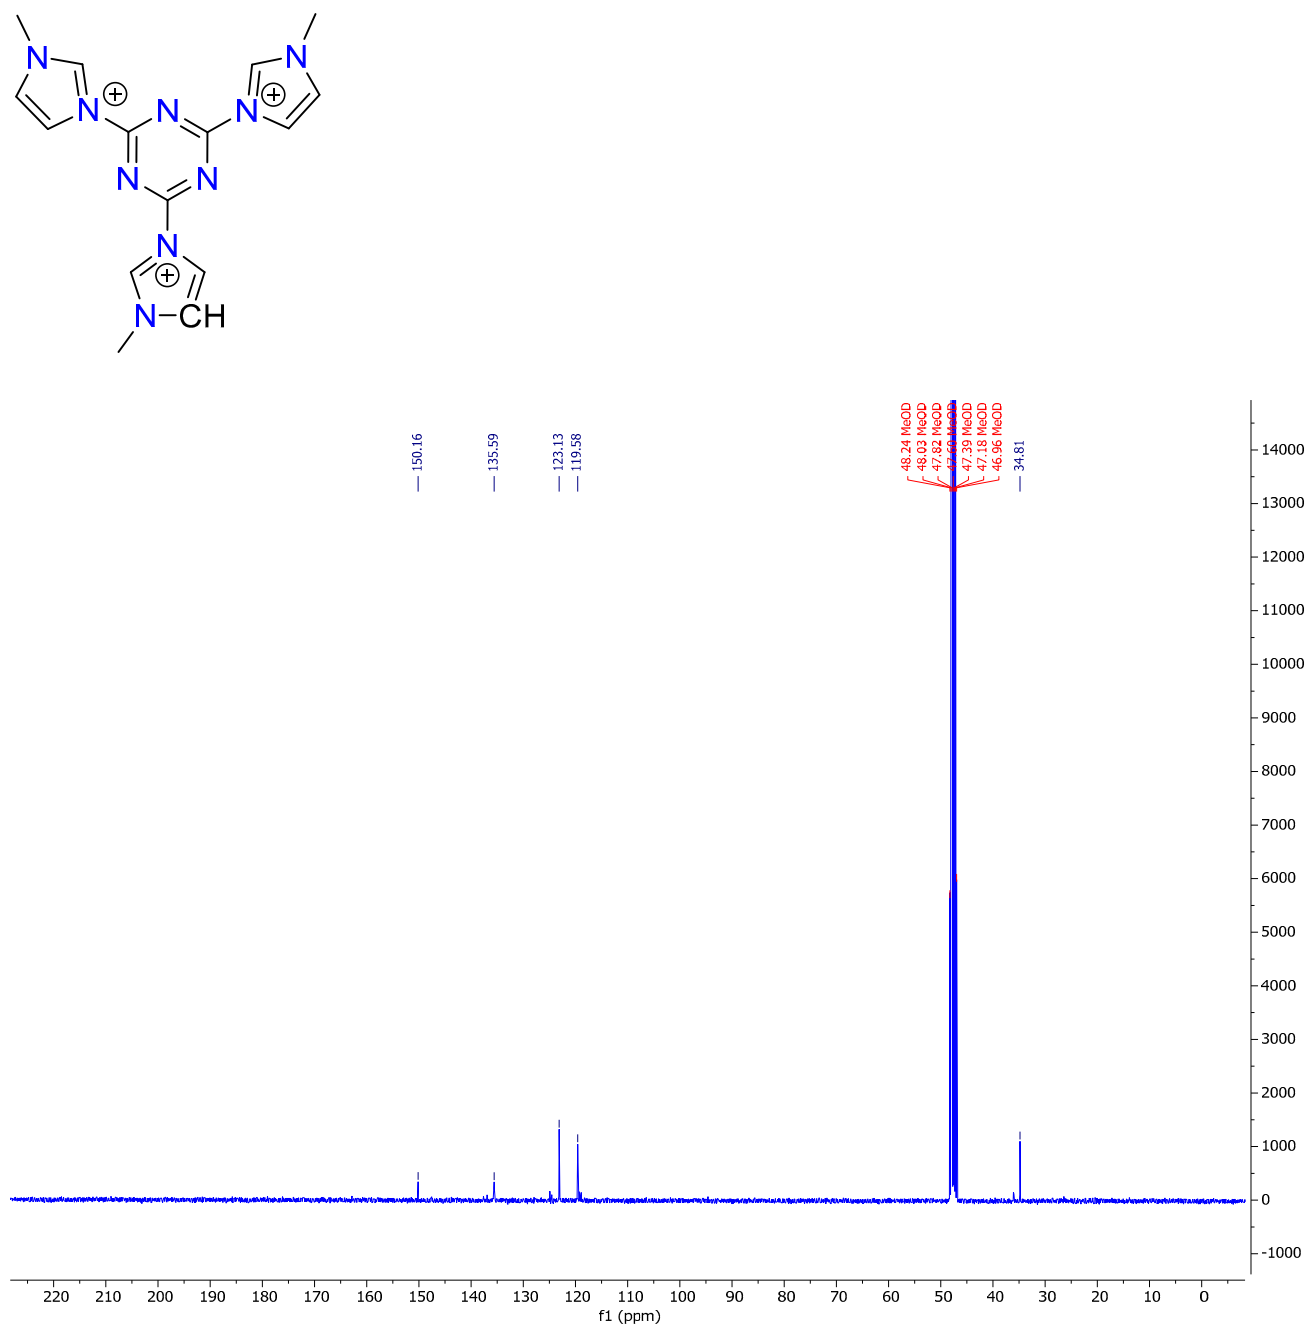

S5.  $^1\text{H}$ -NMR of 1,1',1''-(1,3,5-triazine-2,4,6-triyl)tris(3-carboxypyridin-1-ium) (PrAct-3)

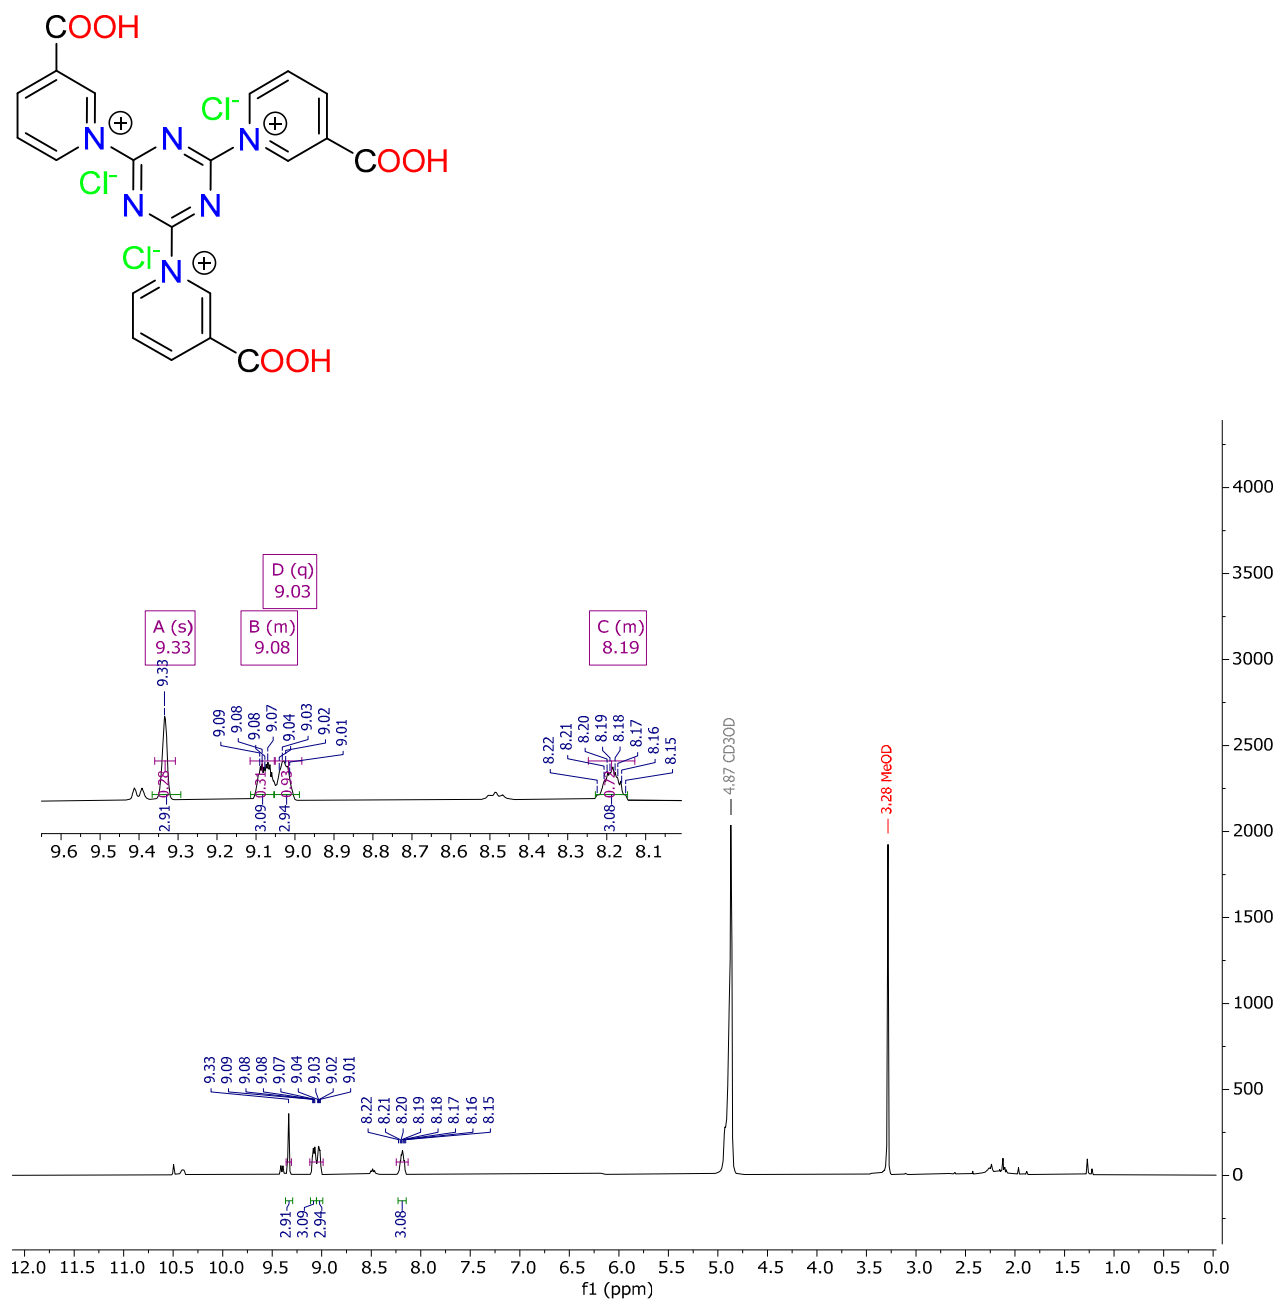

S6.  $^{13}\text{C}$ -NMR of *1,1',1''*-(1,3,5-triazine-2,4,6-triyl)tris(3-carboxypyridin-1-ium) (PrAct-3)

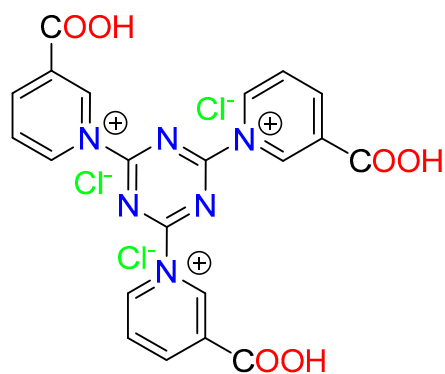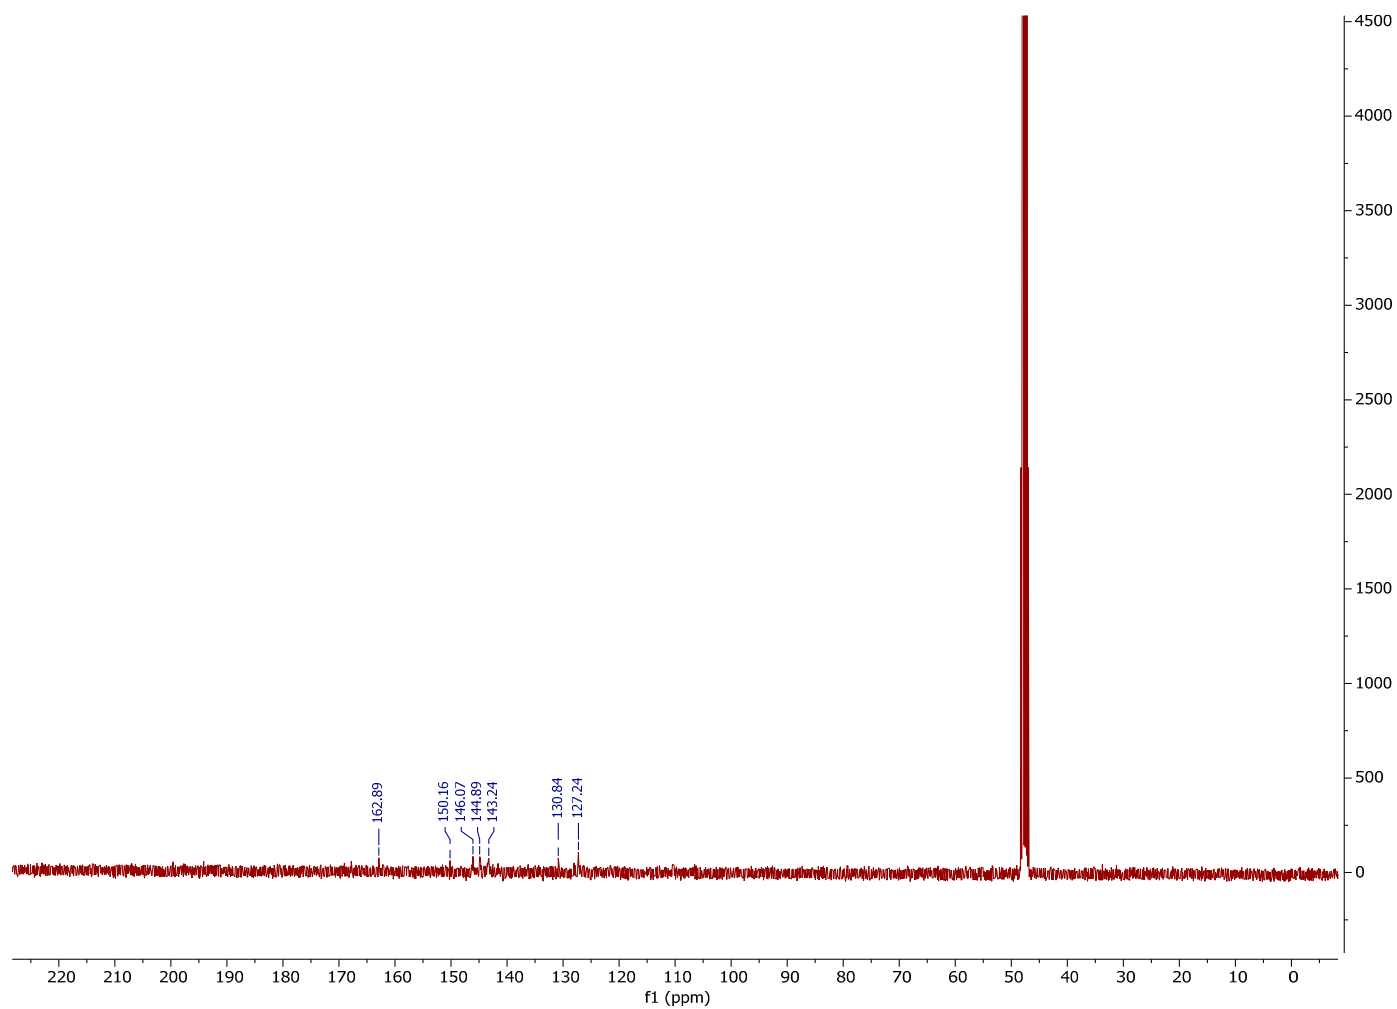



S7.  $^1\text{H}$ -NMR of 2-pyridinium methyl phenyl ketone (Act-1)

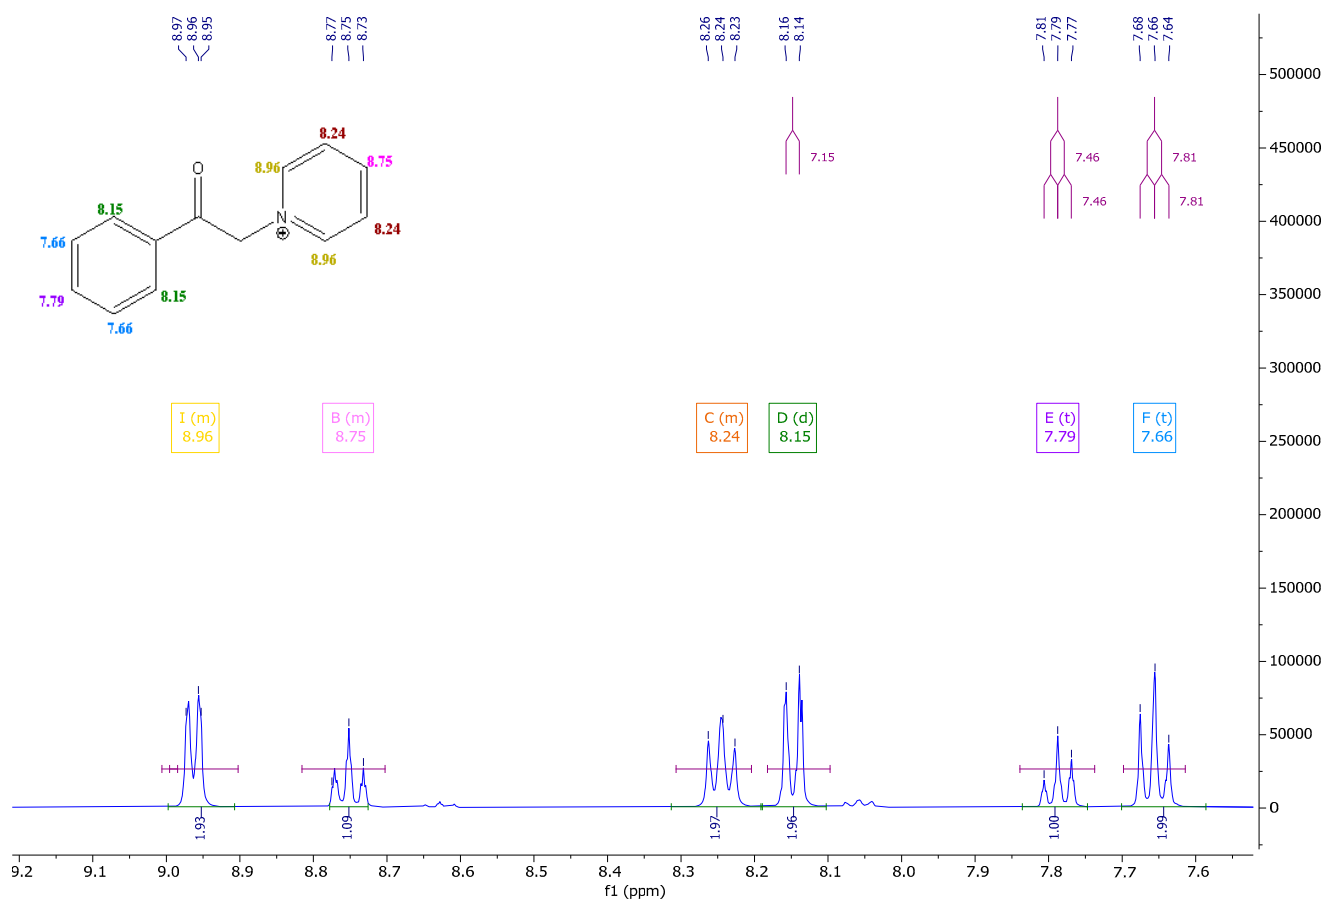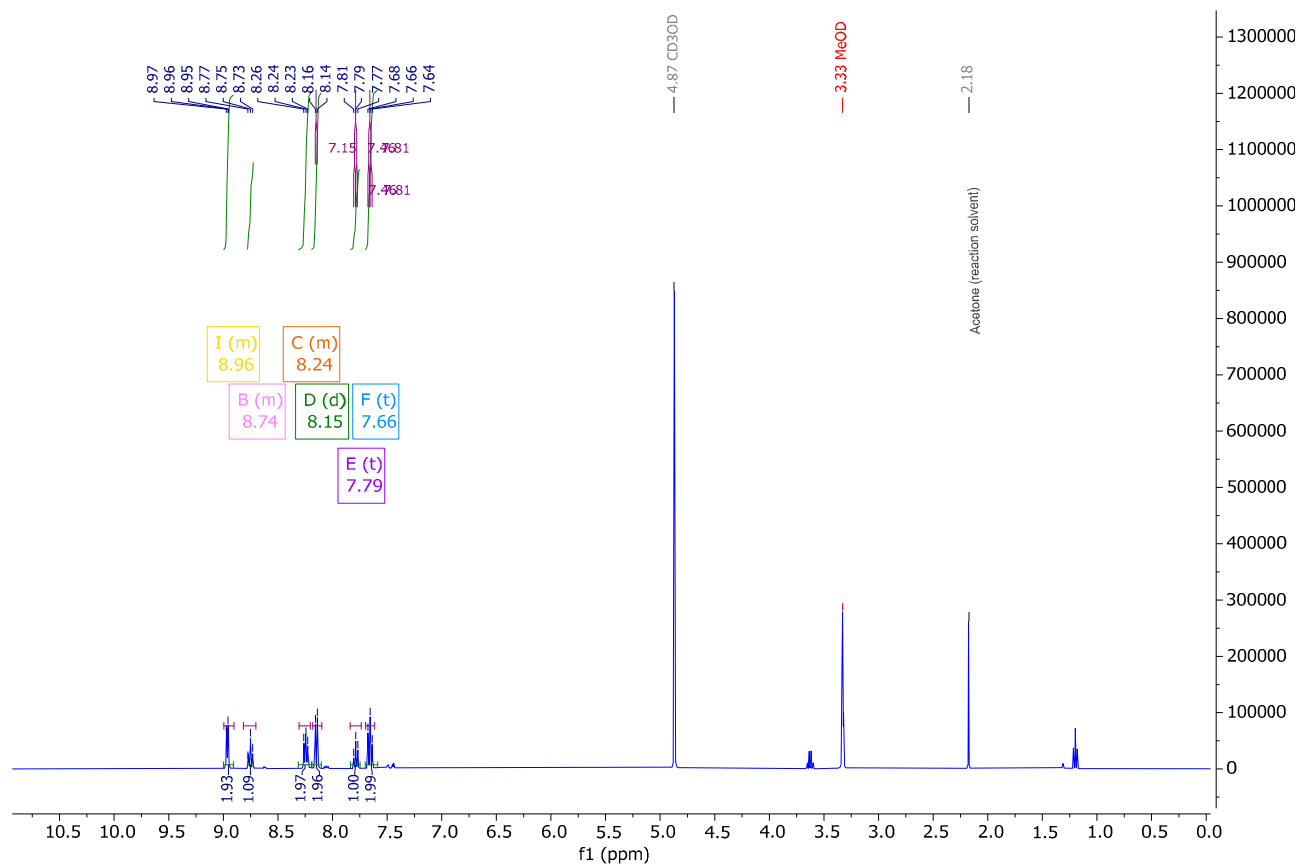

# S8. $^1\text{H}$ -NMR of 2-pyridinium methyl decanyl ketone (Act-2)

## $^1\text{H}$ -NMR in $\text{CD}_3\text{OD}$

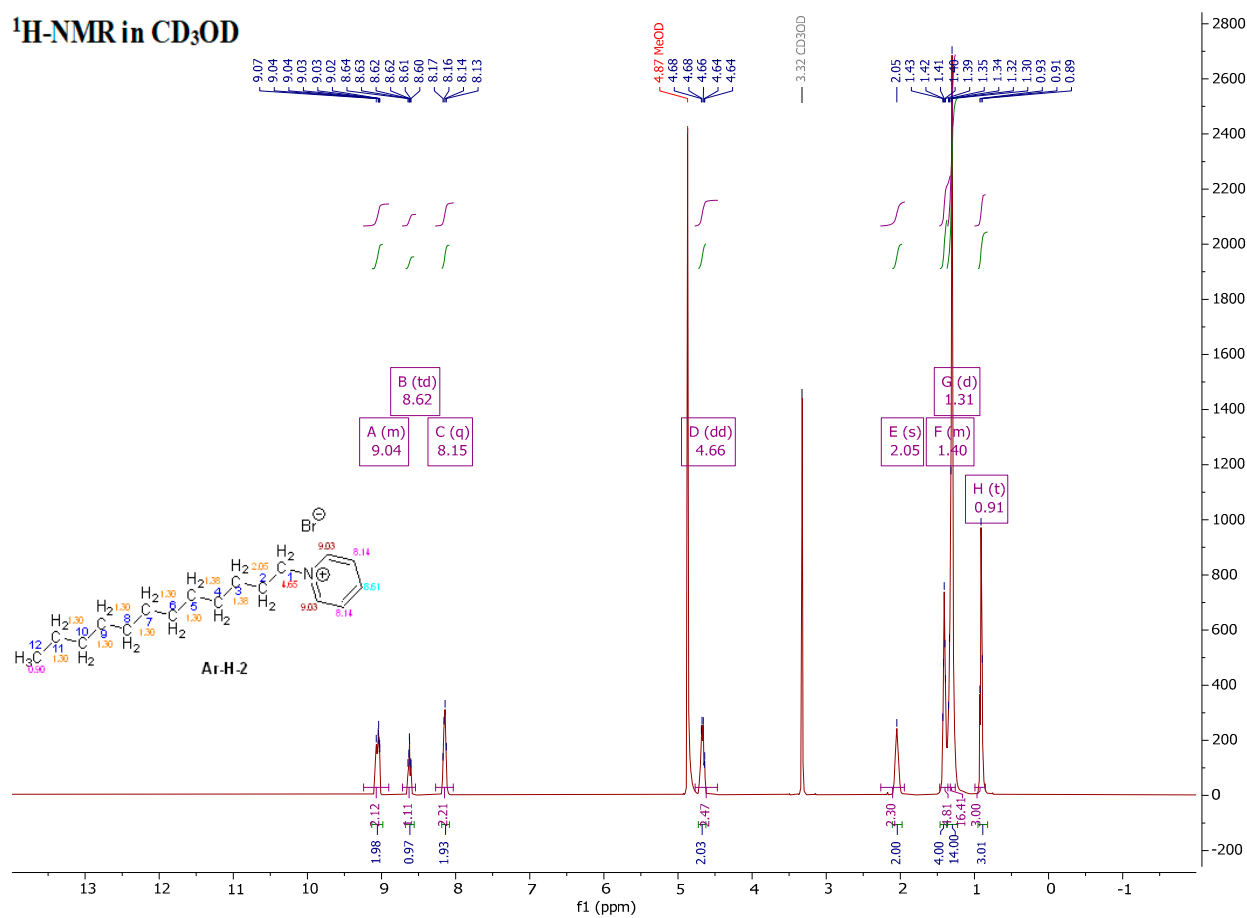

## $^1\text{H}$ -NMR in $\text{DMSO}-d_6$

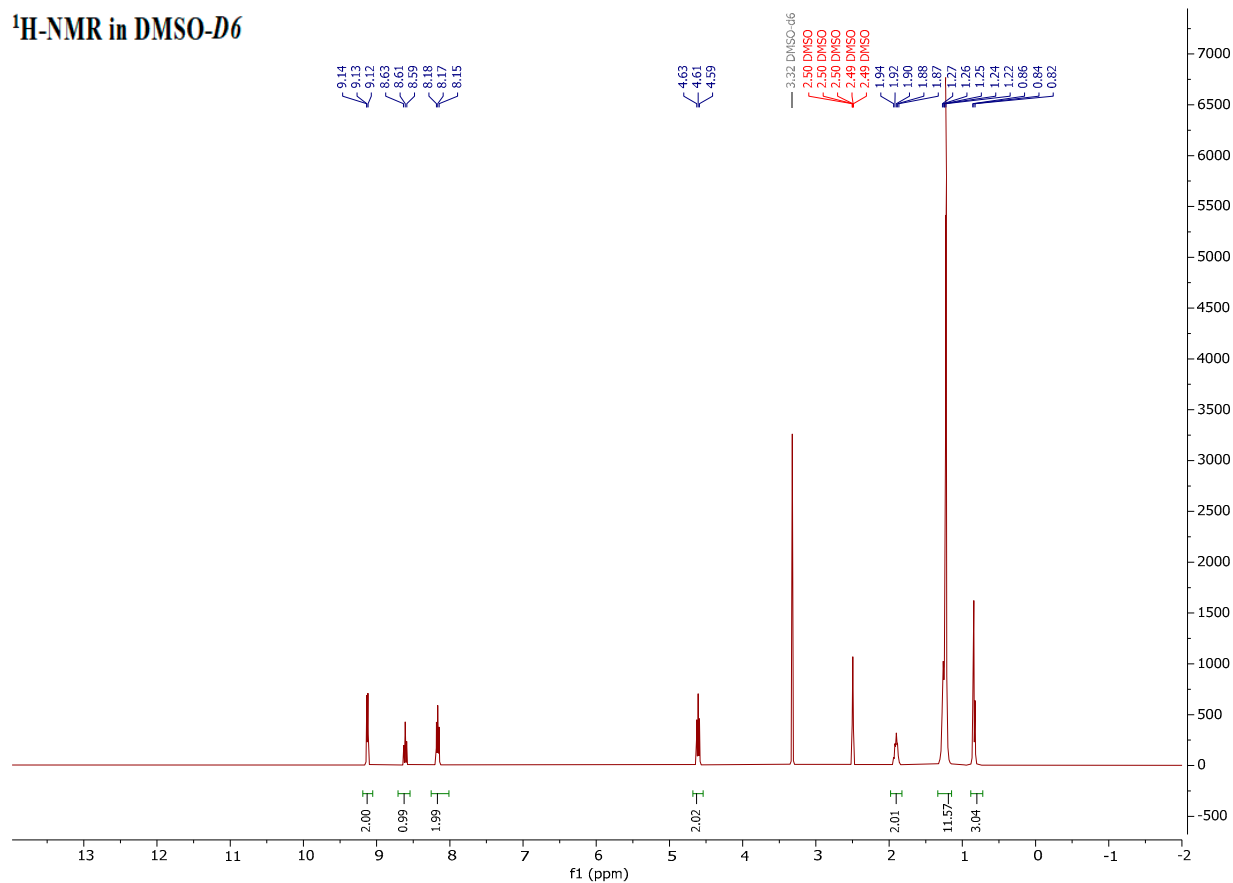

S9.  $^1\text{H}$ -NMR of 3-carboxy-1-dodecylpyridin-1-ium (Act-3)

$^1\text{H}$ -NMR in DMSO- $d_6$

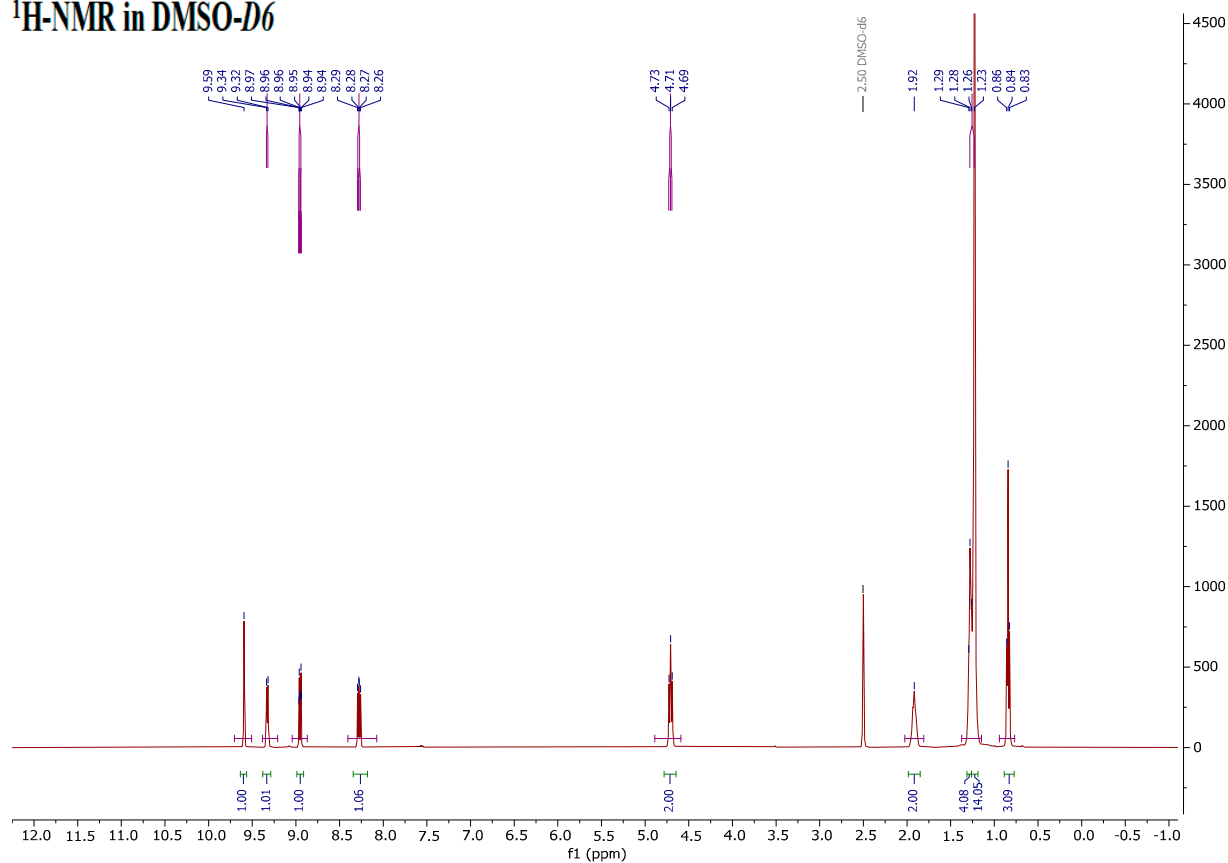

$^1\text{H}$ -NMR in  $\text{CD}_3\text{OD}$

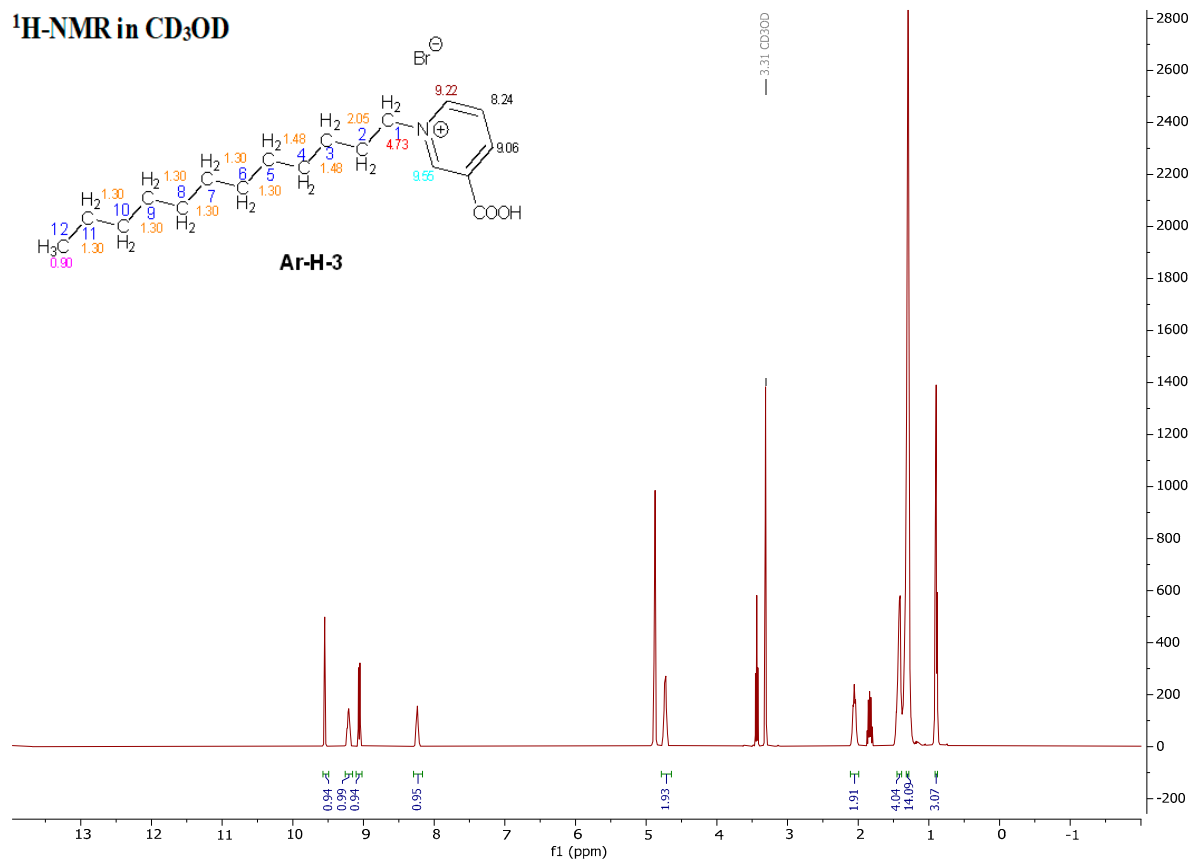

**S10.**  $^1\text{H}$ -NMR of 2-nicotinyl methyl phenyl ketone (Act-4)

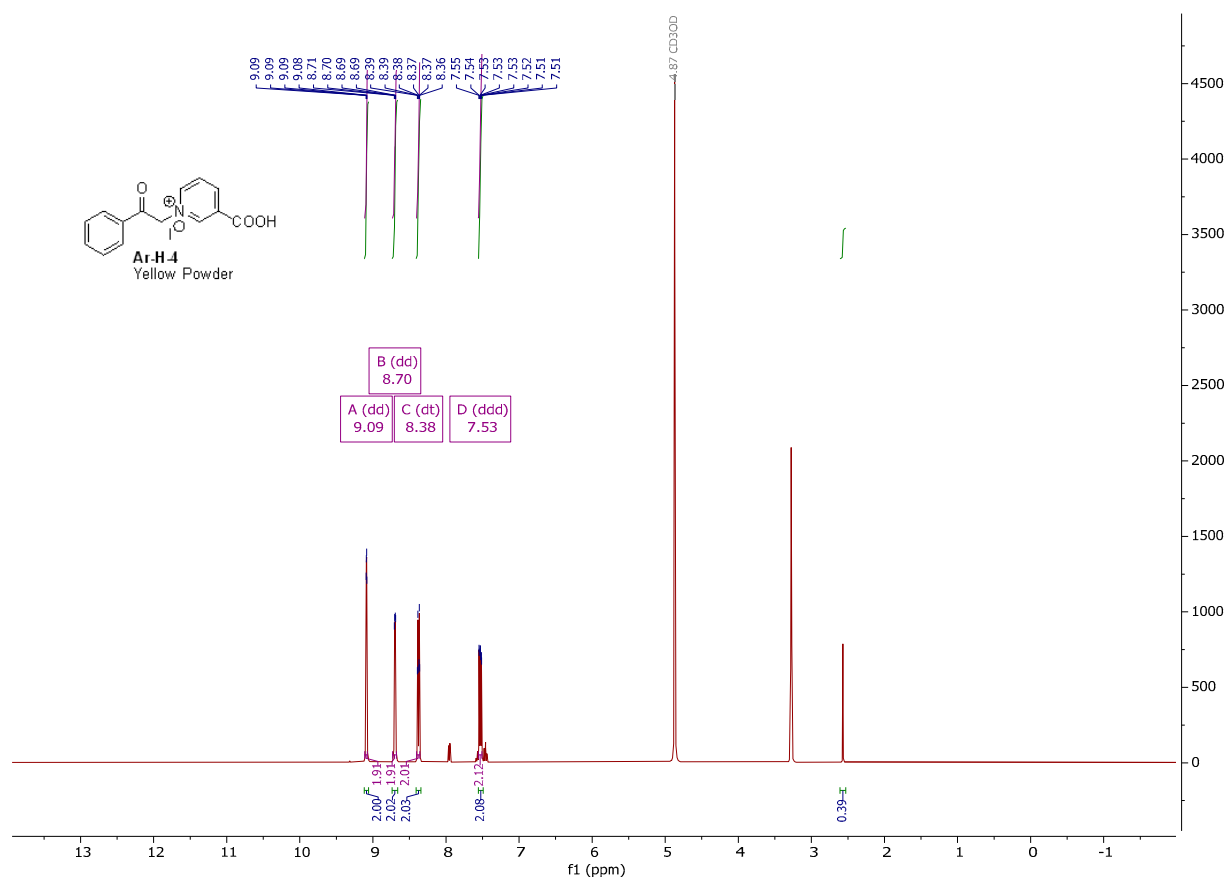

**S11.** Reflectance spectroscopical data for colorant-1 on PrAct-1 preactivated and nonactivated cellulose.

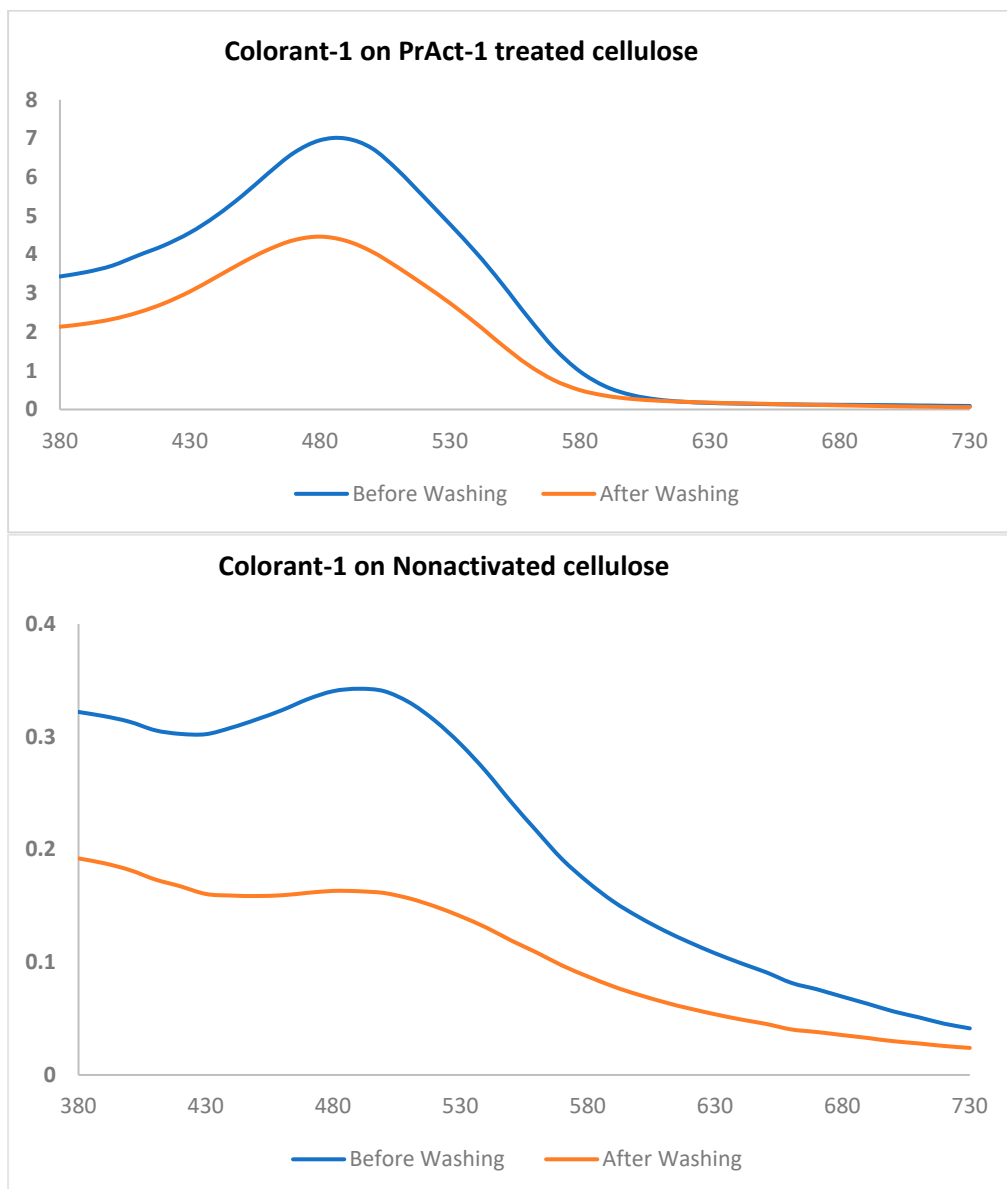

**S12.** Reflectance spectroscopical data for colorant-2 on PrAct-1 preactivated and nonactivated cellulose.

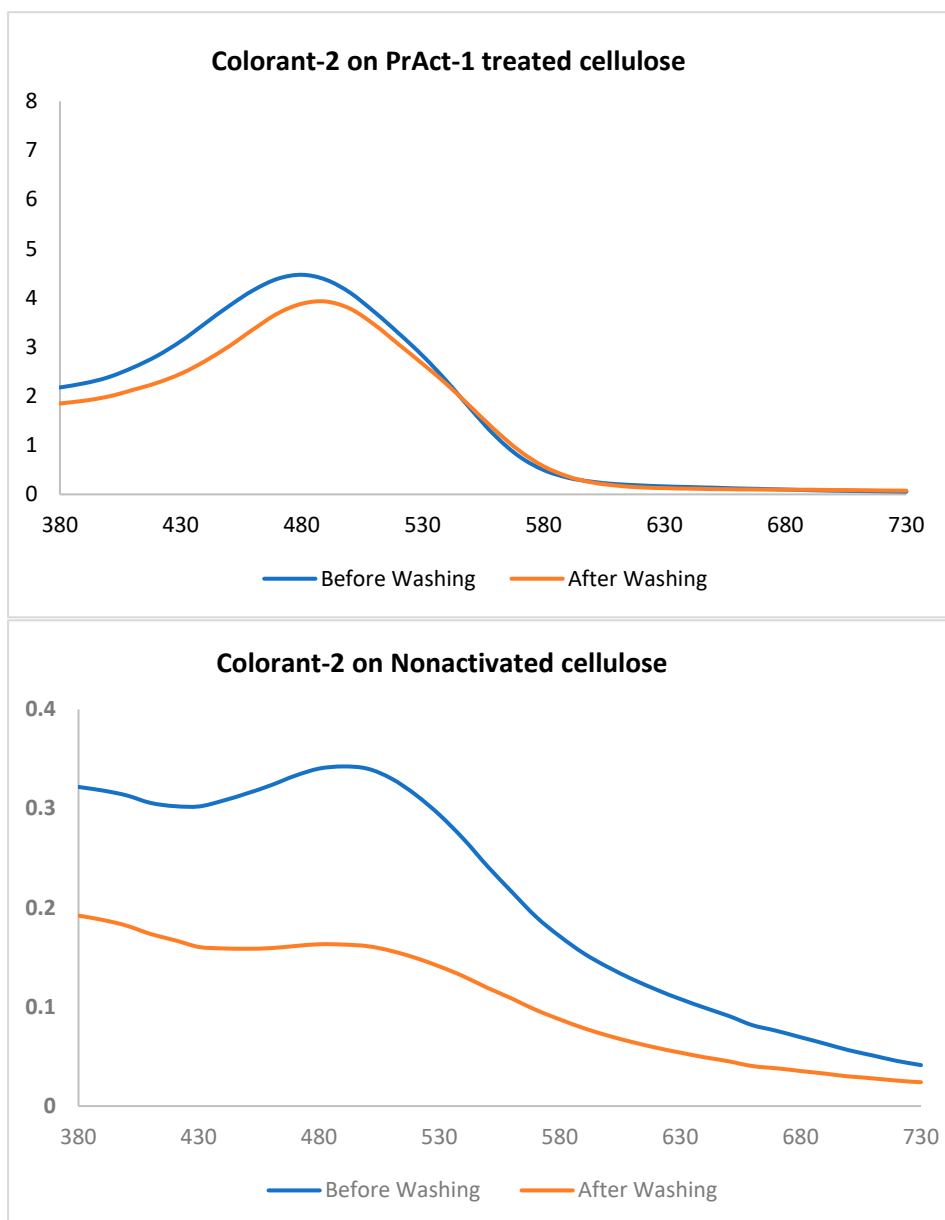

**S13. FTIR Spectroscopy: Chemical characterization of Cysteine-treated preactivated cotton fabrics**

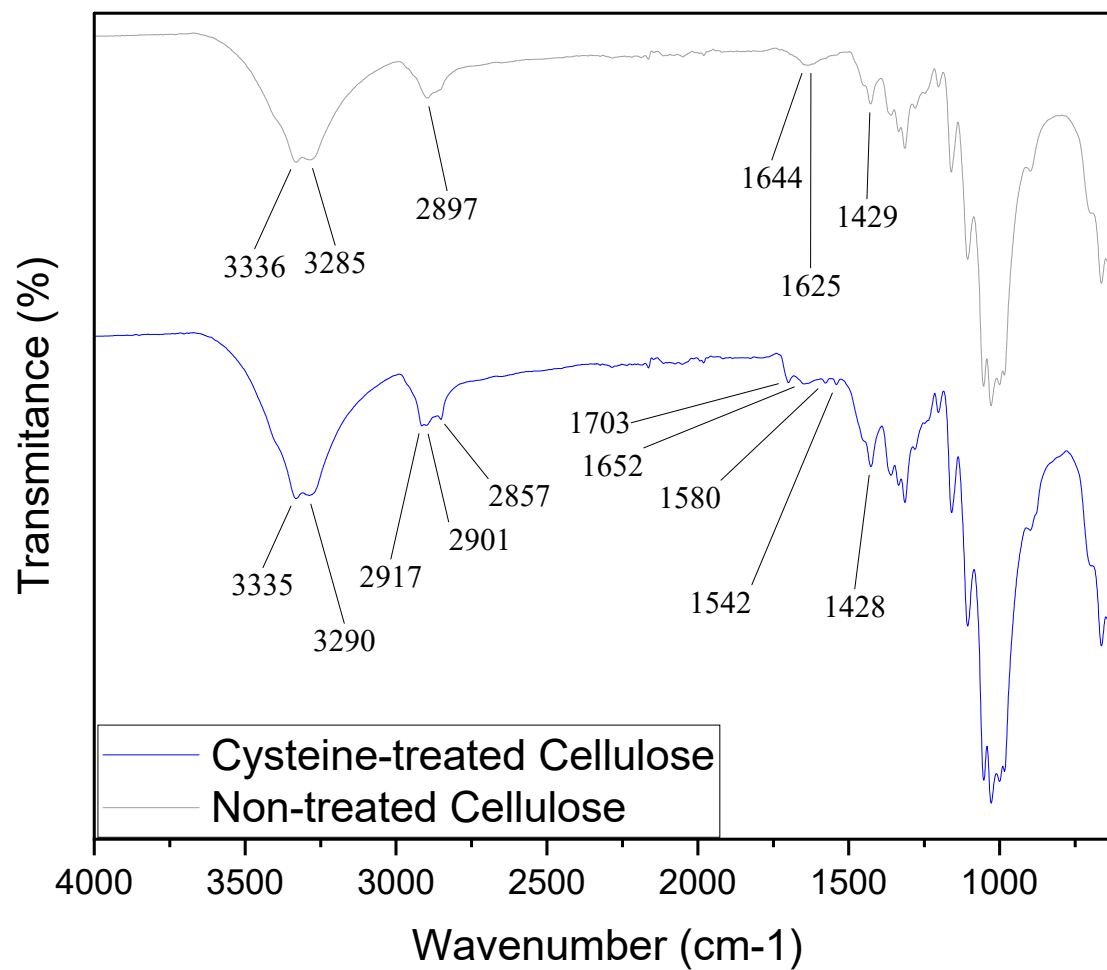

**S14. FTIR Spectroscopy: Chemical characterization of Zein-treated preactivated cotton fabrics**

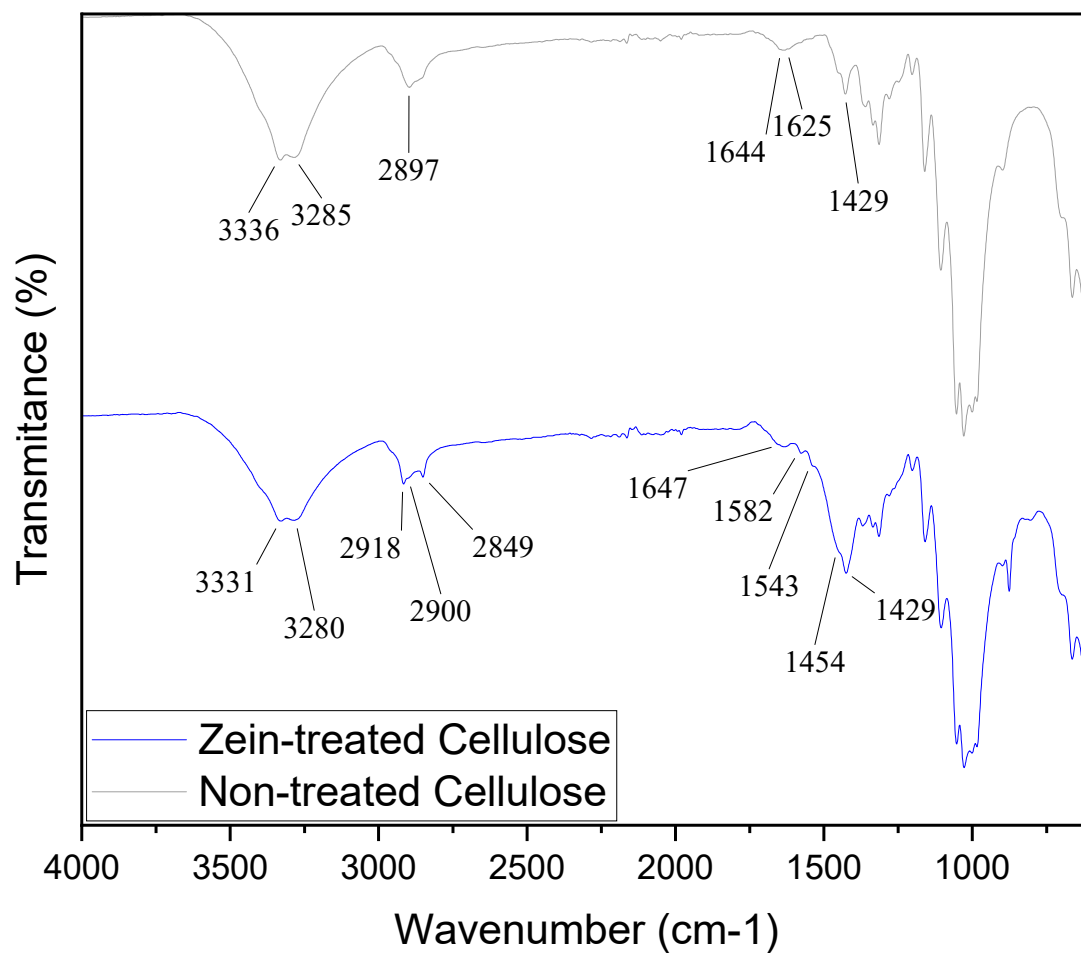



### S15 1-Nonanol-treated preactivated cotton fabrics

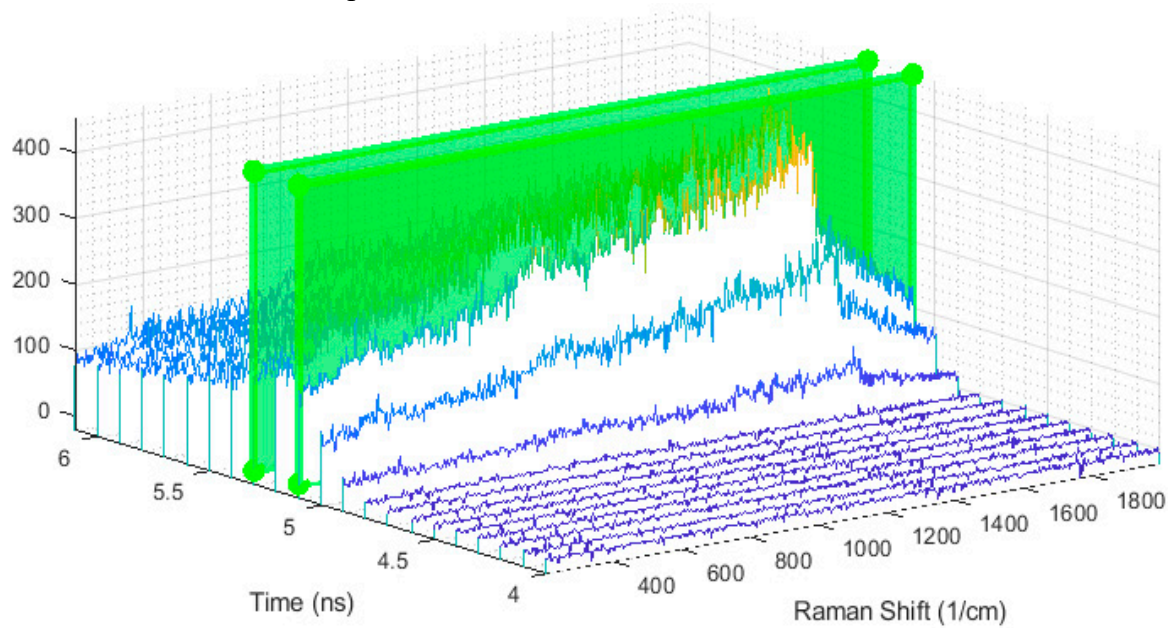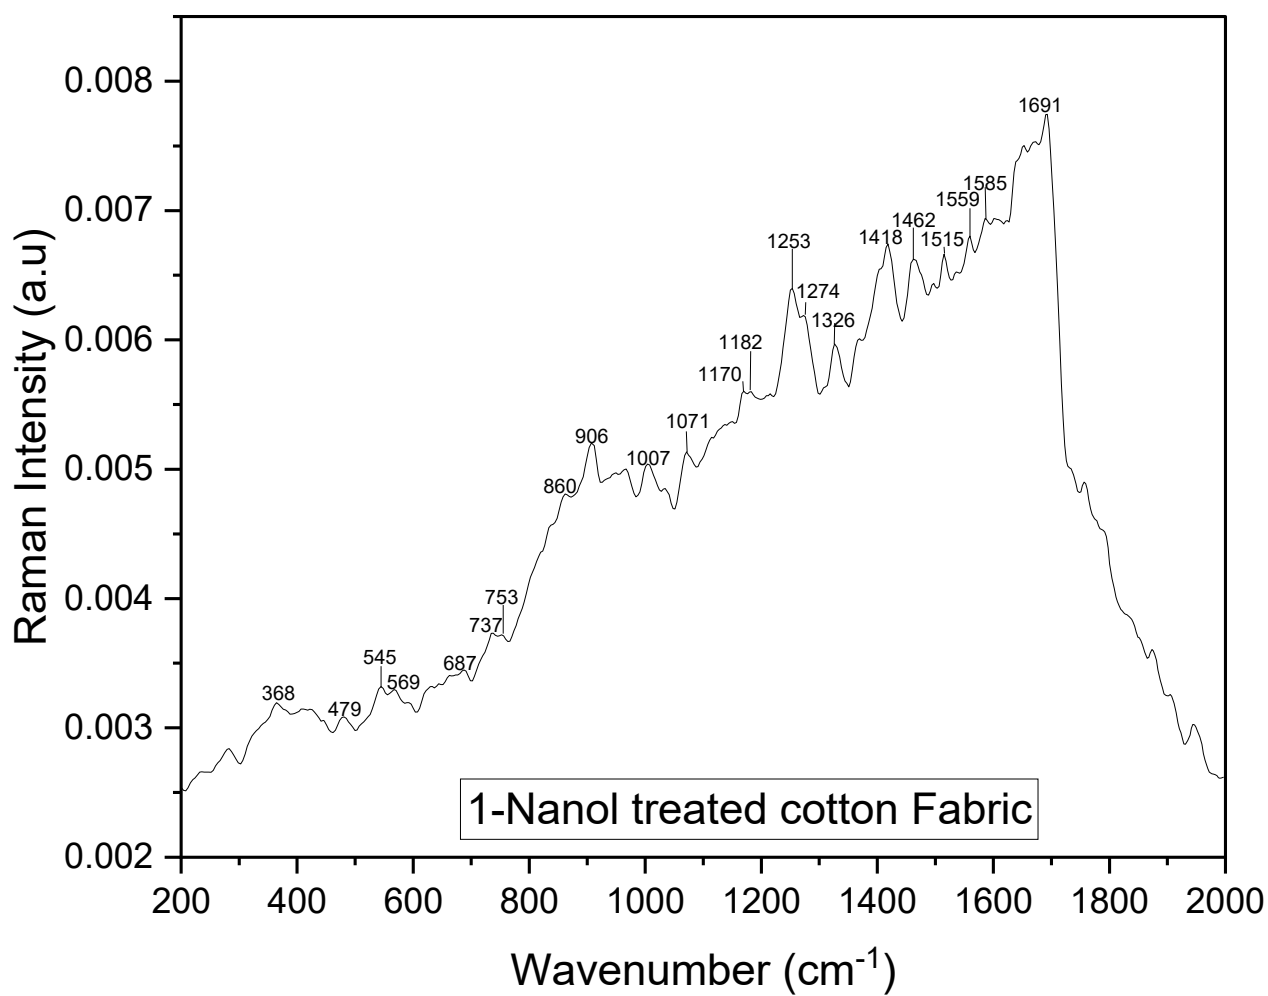

### S16 1,8-Octadiol-treated preactivated cotton fabrics

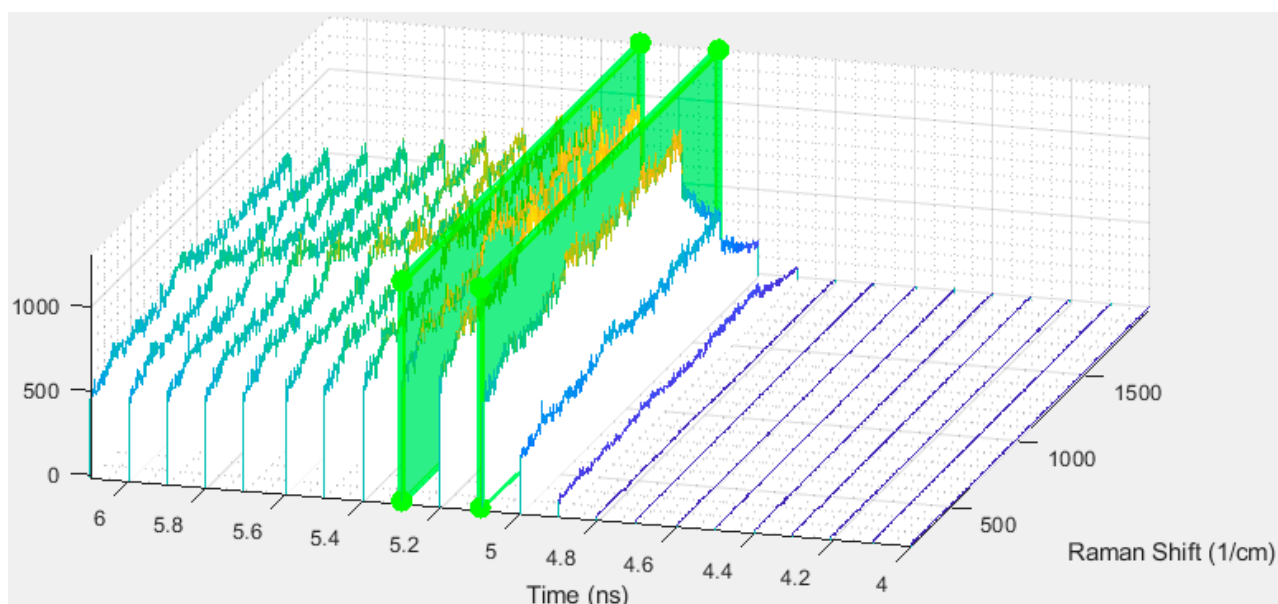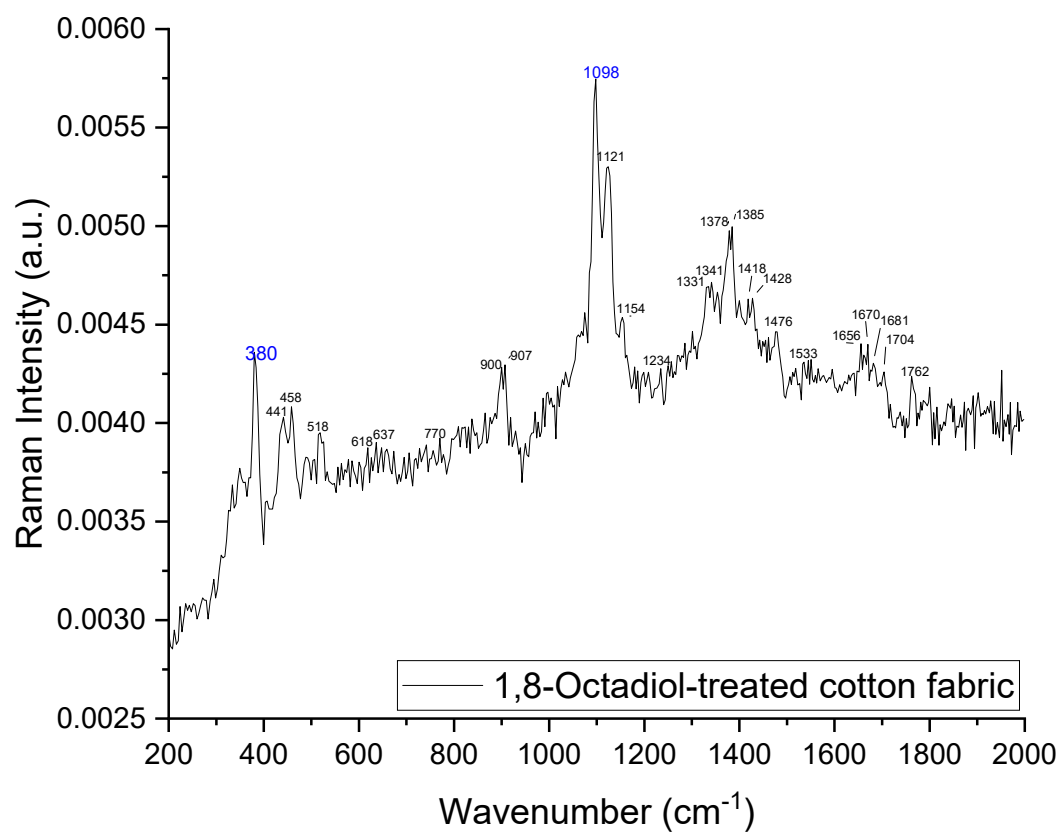

### S17 Cysteine-treated preactivated cotton fabrics

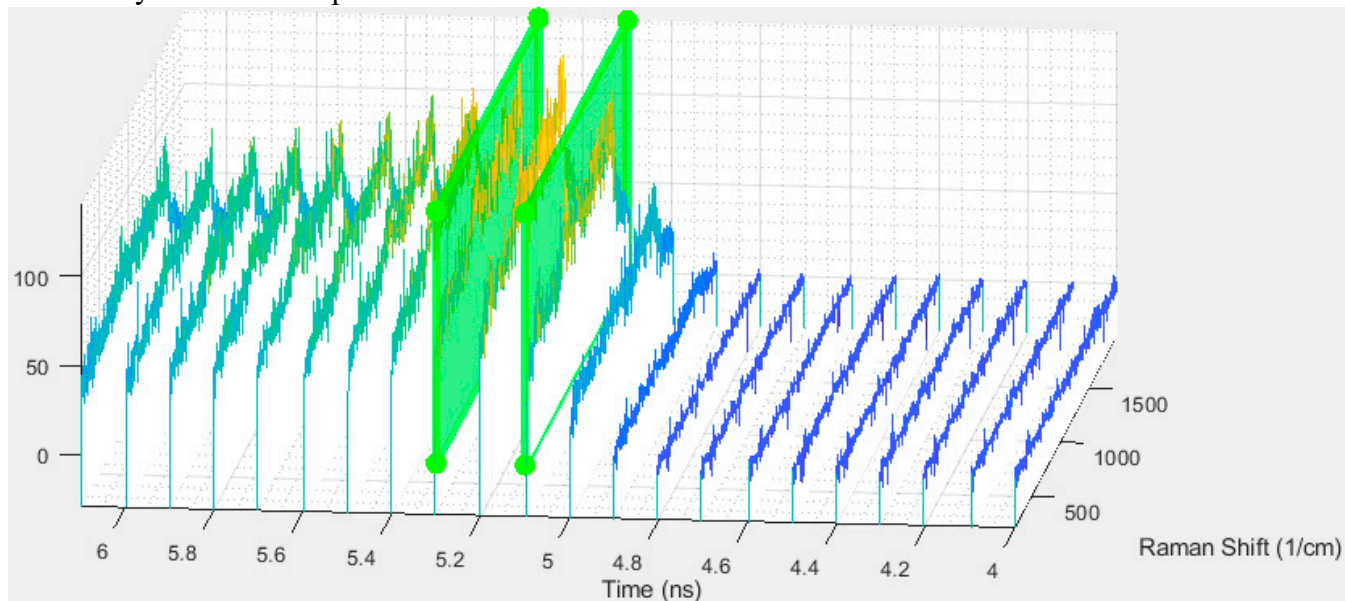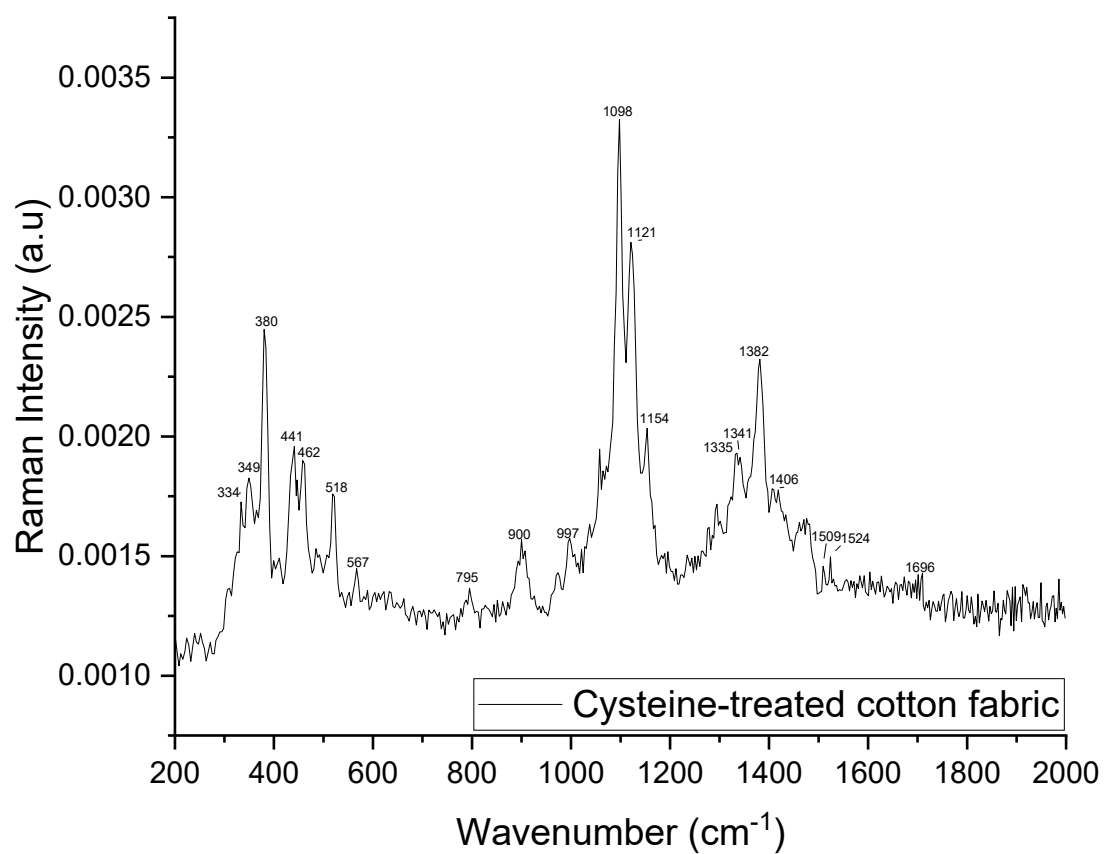

### S18 Benzylamine-treated preactivated cotton fabrics

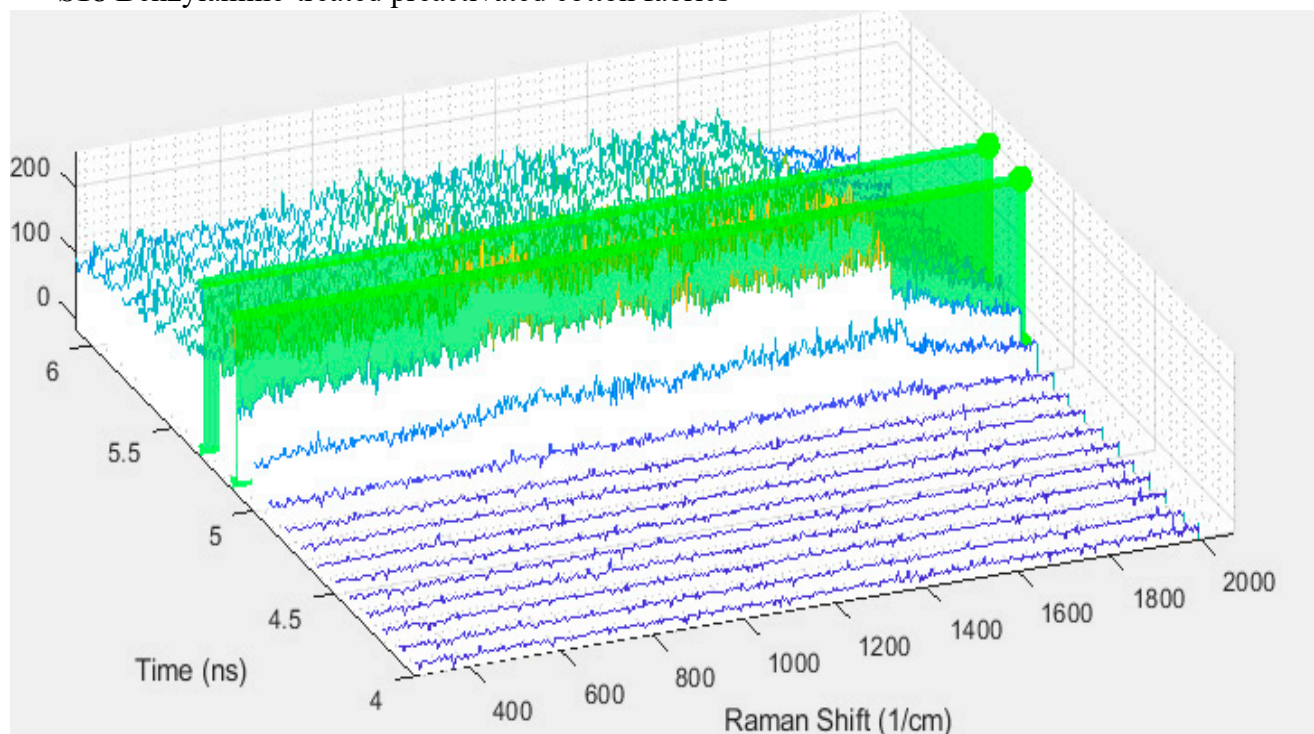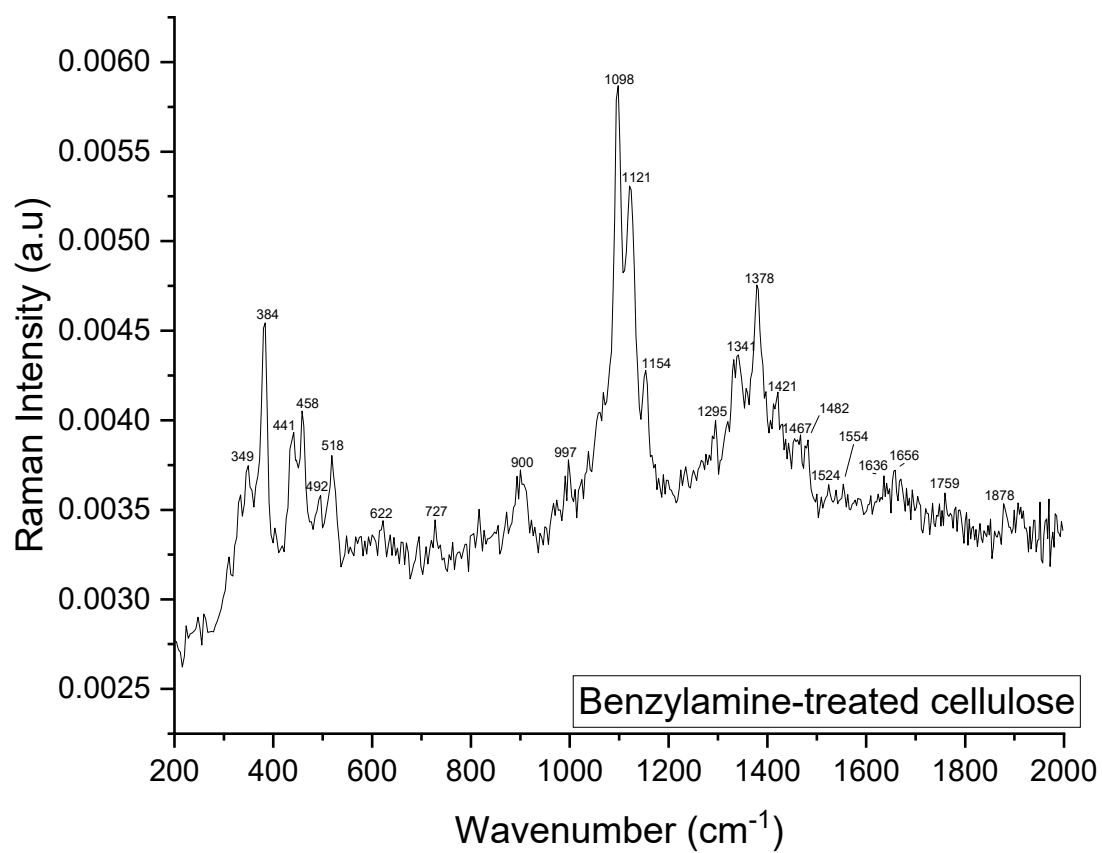

### S19 Phenol-treated preactivated cotton fabrics

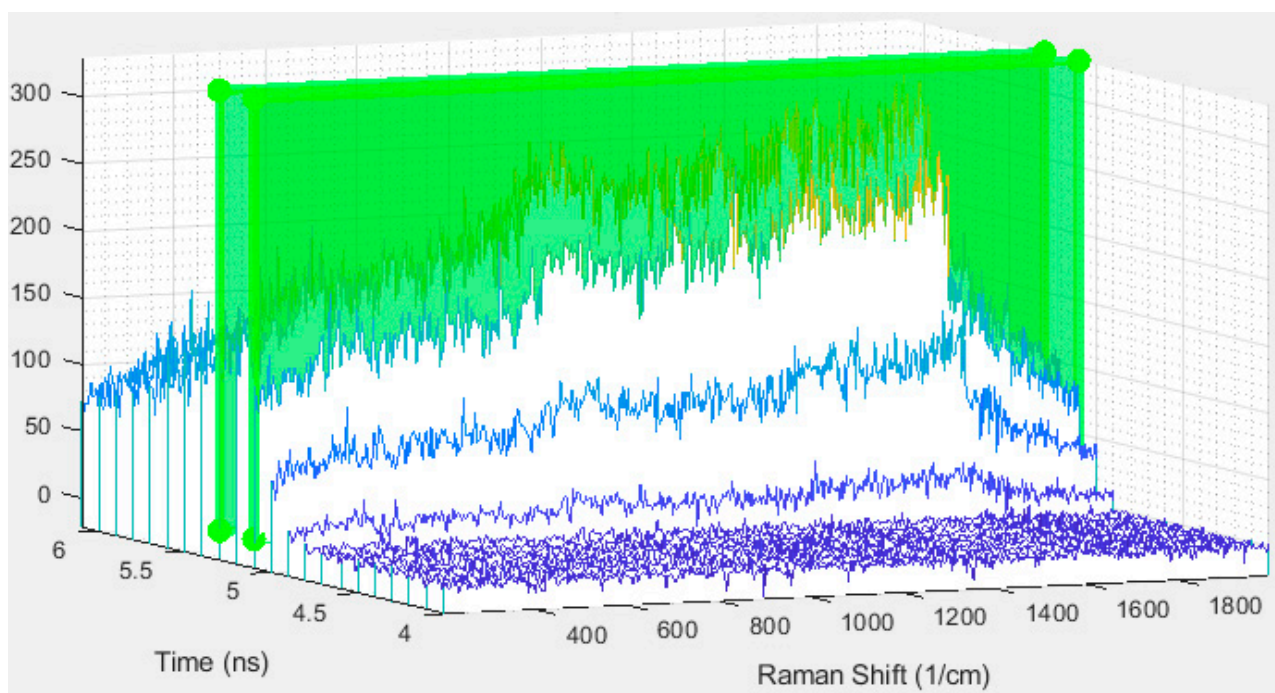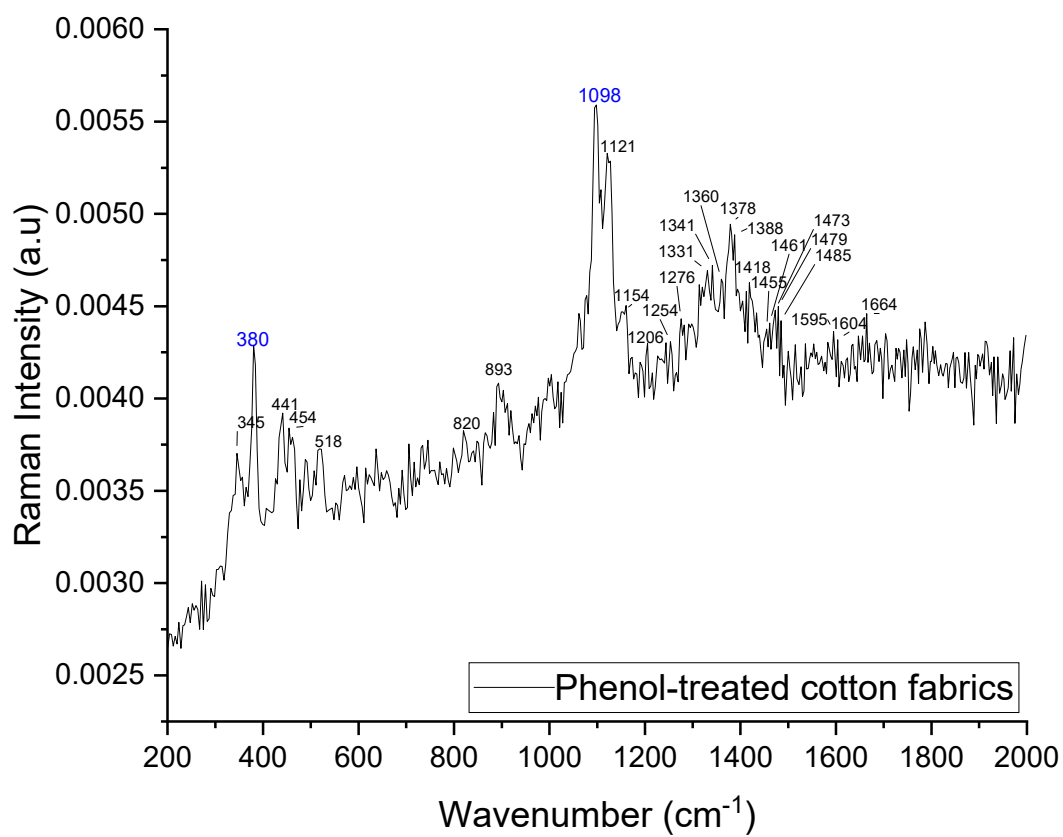



## S20 Act-1-treated preactivated cotton fabrics

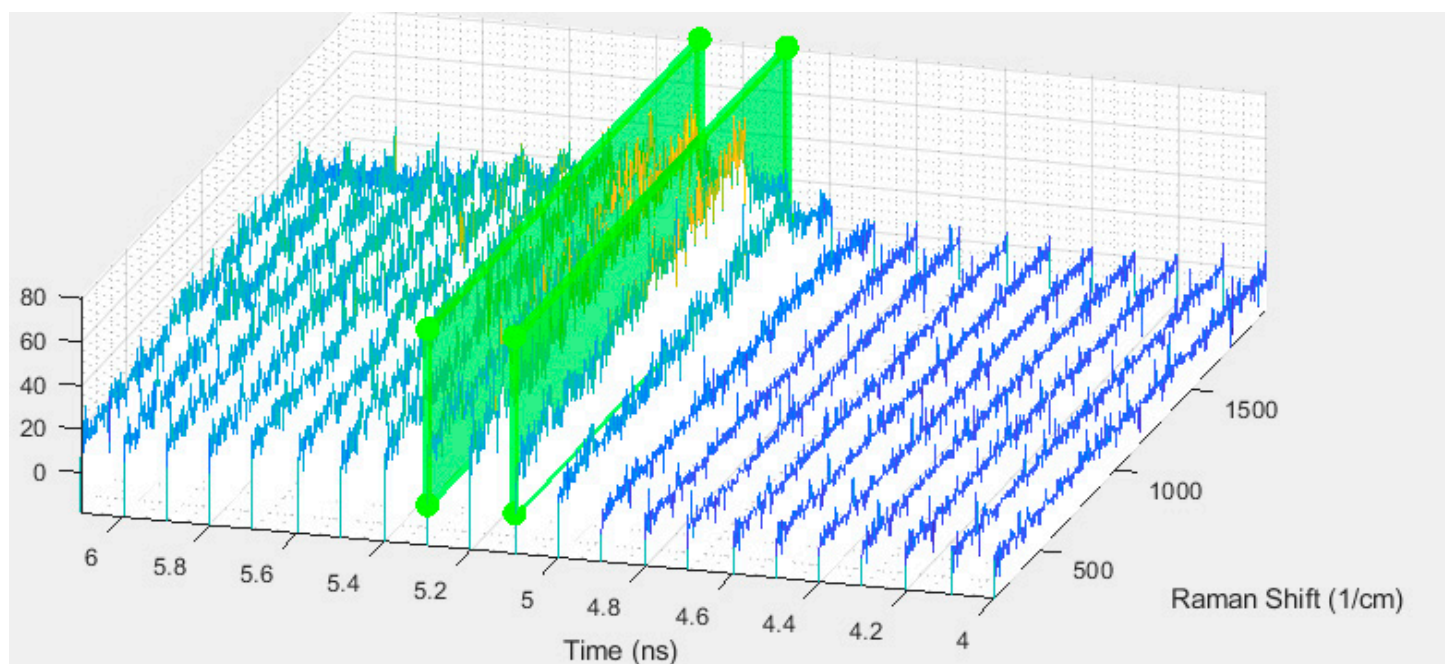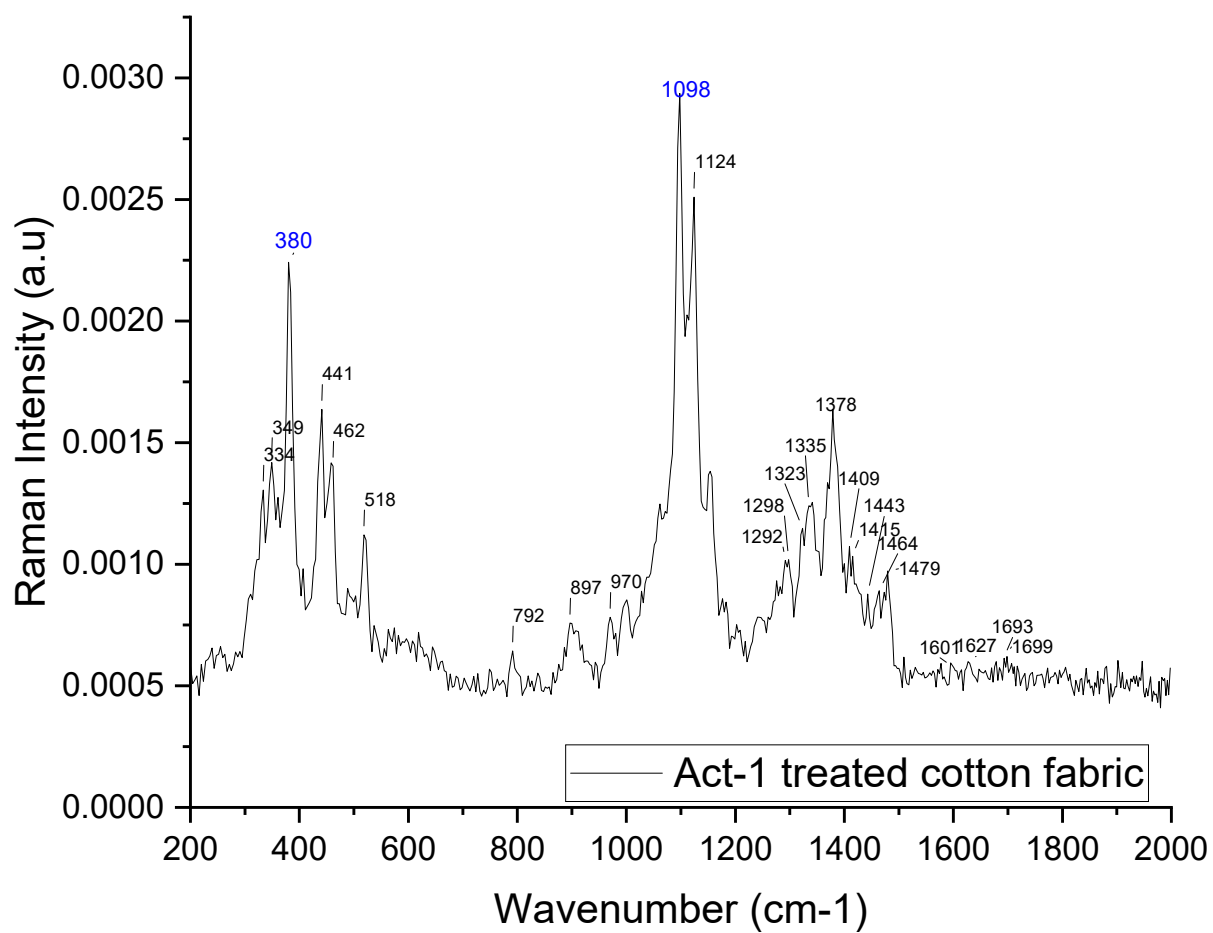

## S21 Act-2-treated preactivated cotton fabrics

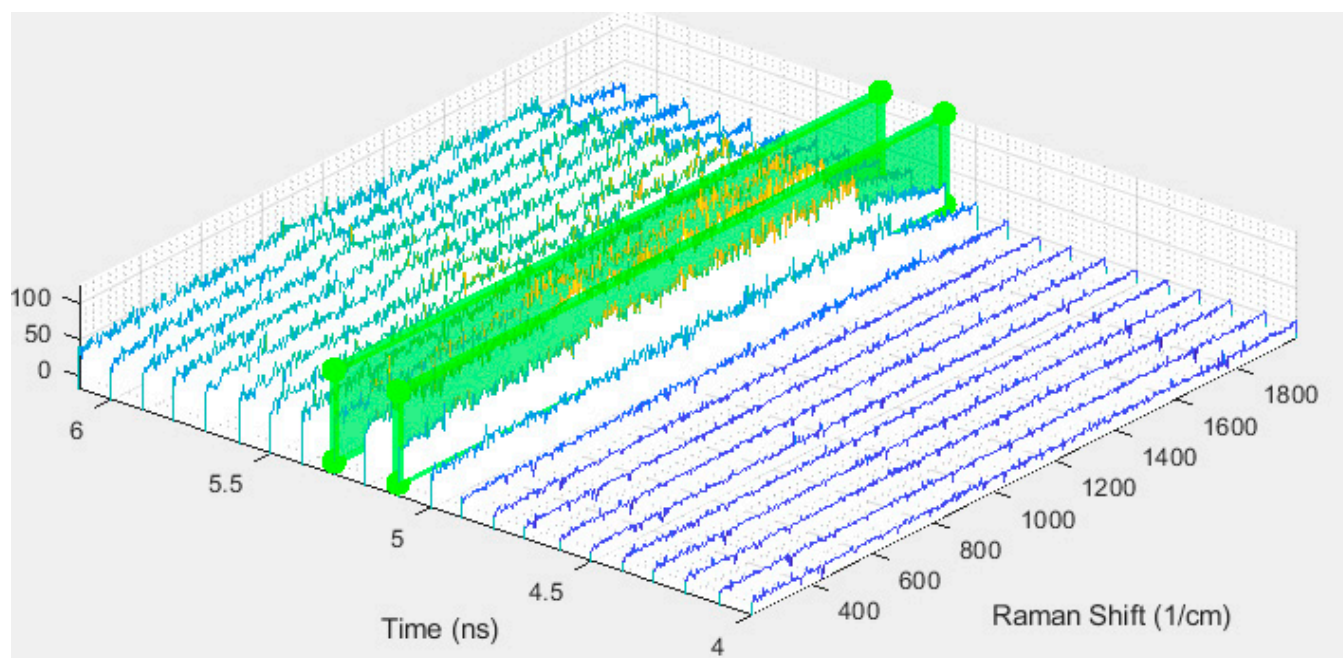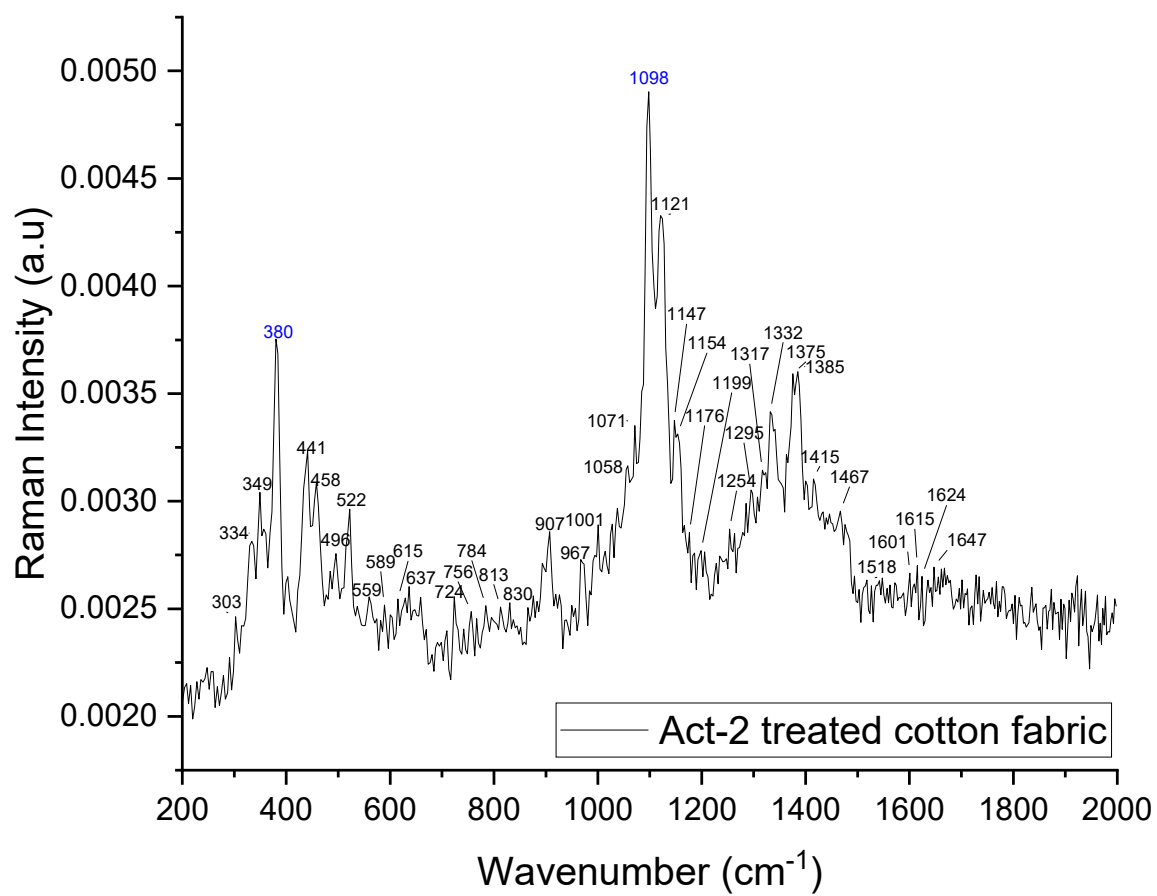

Supplement: s1 [file s1]
